# Supplementary material for: N-heterocyclic silylene stabilized monocordinated copper(i)–arene cationic complexes and their application in click chemistry
Source: Royal Society of Chemistry journal article supplement (doi:10.1039/c9cc09115g), 2019-11-28

## Supporting Information

# **N-heterocyclic silylene stabilized monocordinated copper(I)- arene cationic complexes and their application in Click chemistry**

Nasrina Parvin,<sup>a</sup> Javed Hossain,<sup>a</sup> Anjana George,<sup>b</sup> Pattiyil Parameswaran\*<sup>b</sup> and Shabana Khan\*<sup>a</sup>

### **Contents**

- S1. Experimental Details
- S2. Crystal Data and Structure Refinements for **2**, **3**, **5**, **6**, **8** and **9**
- S3. Deduction of hapticities in **2**, **3**, **5** and **6**.
- S4. Computational Methodology
- S5. <sup>1</sup>H NMR spectrum of the catalysis products

## S1. Experimental Details:

All experiments were carried out under an atmosphere of dry argon or in vacuo using standard Schlenk technique and in a dinitrogen filled MBRAUN MB 150-G1 glovebox. The solvents used were purified by MBRAUN solvent purification system MB SPS-800. All the chemicals purchased from Aldrich were used without further purification.  $^1\text{H}$ ,  $^{13}\text{C}$ ,  $^{29}\text{Si}$  and  $^{19}\text{F}$  NMR spectra were recorded with Bruker 400 MHz spectrometer, using  $\text{CDCl}_3$  as solvent with an external standard ( $\text{SiMe}_4$  for  $^1\text{H}$ ,  $^{13}\text{C}$ ,  $^{29}\text{Si}$  and  $\text{CHF}_3$  for  $^{19}\text{F}$ ). Concentrated solution of the samples in  $\text{CDCl}_3$  were sealed off in a NMR tube for measurement. Mass spectra were recorded using AB Sciex, 4800 plus MALDI TOF/TOF.

### Synthesis of 2:

$\text{AgSbF}_6$  (0.171g, 0.5 mmol) was dissolved in DCM and added to the solution of **1** (0.295g, 0.25 mmol) in toluene. It was stirred for overnight at room temperature.  $\text{AgBr}$  was precipitated out from the reaction mixture was filtered off and the volume was reduced to 15 mL and kept it at  $0^\circ\text{C}$ . The colorless, block shaped crystals suitable for x-ray analysis was observed after one day. Yield: 0.252g (61%). Mp: 134-139  $^\circ\text{C}$ .  $^1\text{H}$  NMR (400 MHz,  $\text{CDCl}_3$ , 298K):  $\delta$  0.29 (*s*, 9H,  $\text{SiMe}_3$ ), 0.41 (*s*, 9H,  $\text{SiMe}_3$ ), 1.19 (*s*, 18H,  $\text{CMe}_3$ ), 2.51 (*s*, 3H,  $\text{CH}_{3,\text{toluene}}$ ), 7.32-7.38 (*m*, 2H, Ph), 7.46-7.53 (*m*, 4H, Ph), 7.55-7.60 (*m*, 3H, Ph), 7.66-7.70 (*m*, 1H, Ph) ppm.  $^{13}\text{C}\{^1\text{H}\}$  NMR (100.613 MHz,  $\text{CDCl}_3$ , 298 K):  $\delta$  4.56 ( $\text{SiMe}_3$ ), 5.93 ( $\text{SiMe}_3$ ), 21.62 ( $\text{CH}_{3,\text{toluene}}$ ), 31.70 ( $\text{CMe}_3$ ), 54.93 ( $\text{CMe}_3$ ), 121.33, 121.62, 125.20, 125.41, 127.30, 127.48, 128.05, 128.12, 128.18, 129.16, 129.76, 131.21 (Ph-C), 170.01 (NCN) ppm.  $^{29}\text{Si}\{^1\text{H}\}$  NMR (79.495 MHz,  $\text{CDCl}_3$ , 298 K):  $\delta$  7.52 ( $\text{SiMe}_3$ ), 6.72 ( $\text{SiMe}_3$ ), 2.28 ( $\text{SiN}(\text{SiMe}_3)_2$ ) ppm.  $^{19}\text{F}\{^1\text{H}\}$  NMR (376.49 MHz,  $\text{CDCl}_3$ , 298):  $\delta$  -162.88 ppm. MALDI: *m/z*  $[\text{C}_{29}\text{H}_{52}\text{CuN}_3\text{Si}_3]^+$ : 482.20 [ $\text{M}-\text{MeC}_6\text{H}_5$ ]. Anal Calcd: C, 42.15; H, 6.34; N, 5.09. Found: C, 42.24; H, 6.44; N, 5.27.

### Synthesis of 3:

AgSbF<sub>6</sub> (0.171g, 0.5 mmol) was dissolved in DCM and added to the solution of **1** (0.295g, 0.25 mmol) in *m*-xylene. It was stirred overnight at room temperature. The solution was filtered to separate AgBr, concentrated to 10 mL and kept it at 0°C overnight to afford colorless crystals of **3**. Yield: 0.280g (67%). Mp: 108-113 °C. <sup>1</sup>H NMR (400 MHz, CDCl<sub>3</sub>, 298K): δ 0.29 (*s*, 9H, SiMe<sub>3</sub>), 0.47 (*s*, 9H, SiMe<sub>3</sub>), 1.25 (*s*, 18H, CMe<sub>3</sub>), 2.28 (*s*, 6H, CH<sub>3,*m*-xylene</sub>), 6.94-7.02 (*m*, 2H, Ph), 7.37-7.53 (*m*, 7H, Ph) ppm. <sup>13</sup>C{<sup>1</sup>H} NMR (100.613 MHz, CDCl<sub>3</sub>, 298 K): δ 3.83 (SiMe<sub>3</sub>), 5.22 (SiMe<sub>3</sub>), 20.33 (Me<sub>2</sub>C<sub>6</sub>H<sub>4</sub>), 30.86 (CMe<sub>3</sub>), 53.80 (CMe<sub>3</sub>), 125.58, 126.55, 127.23, 127.51, 127.71, 127.89, 128.16, 128.95, 129.23, 129.99, 130.35 (Ph-C), 167.68 (NCN) ppm. <sup>29</sup>Si{<sup>1</sup>H} NMR (79.495 MHz, CDCl<sub>3</sub>, 298 K): δ 7.49 (SiMe<sub>3</sub>) (marched two SiMe<sub>3</sub> peak to give a broad peak), 2.80 (SiN(SiMe<sub>3</sub>)<sub>2</sub>) ppm. <sup>19</sup>F{<sup>1</sup>H} NMR (376.49 MHz, CDCl<sub>3</sub>, 298): δ -178.35 (br) ppm. MALDI: *m/z* [C<sub>30</sub>H<sub>54</sub>CuN<sub>3</sub>Si<sub>3</sub>]<sup>+</sup>: 482.25 [M-Me<sub>2</sub>C<sub>6</sub>H<sub>4</sub>]. Anal Calcd: C, 42.88; H, 6.48; N, 5.00. Found: C, 42.92; H, 6.62; N, 4.93.

### Synthesis of 5:

AgSbF<sub>6</sub> (0.171g, 0.5 mmol) was dissolved in DCM and added to the solution of **4** (0.266g, 0.5 mmol) in toluene. Immediately AgBr was precipitated out. After overnight stirring, AgBr was separated out from the reaction mixture by filtration and reduced the volume to 15 mL and kept it at 0°C. Colorless block shaped crystals suitable for X-ray analysis was observed after one day. Yield: 0.295g (74%). Mp: more than 200°C. <sup>1</sup>H NMR (400 MHz, CDCl<sub>3</sub>, 298K): δ 1.23-1.26 (*m*, 24H, CH(CH<sub>3</sub>)<sub>2</sub>), 2.05 (*s*, 3H, CH<sub>3,*toluene*</sub>), 2.40-2.50 (*m*, 4H, CH(CH<sub>3</sub>)<sub>2</sub>), 6.74-6.81 (*m*, 1H, Ph), 6.87-7.01 (*m*, 1H, Ph), 7.08-7.18 (*m*, 1H, Ph), 7.27 (*s*, 1H, Ph), 7.35-7.37 (*s*, 5H, Ph) 7.55-7.59 (*m*, 2H, Ph) ppm. <sup>13</sup>C{<sup>1</sup>H} NMR (100.613 MHz, CDCl<sub>3</sub>, 298 K): δ 21.07, 23.99, 24.59, 28.72, 124.20, 124.45, 131.12, 133.83, 137.91, 145.40 ppm. <sup>19</sup>F{<sup>1</sup>H} NMR (376.49 MHz, CDCl<sub>3</sub>, 298): δ -183.43

(br) ppm. MALDI:  $m/z$   $[C_{35}H_{47}CuN_2]^+$ : 451.02  $[M-MeC_6H_5]$ . Anal Calcd: C, 52.87; H, 5.96; N, 3.52. Found: C, 52.72; H, 5.80; N, 3.57.

### Synthesis of 6:

AgSbF<sub>6</sub> (0.171g, 0.5 mmol) was dissolved in DCM and added to the solution of **4** (0.266g, 0.5 mmol) in *m*-xylene. Immediately AgBr was precipitated out. After overnight stirring, AgBr was separated out from the reaction mixture by filtration and reduced the volume to 10 mL and kept it at 0°C. Colorless block shaped crystals suitable for X-ray analysis was observed after one day. Yield: 0.315g (78%). Mp: 170°C (decomposed). <sup>1</sup>H NMR (400 MHz, CDCl<sub>3</sub>, 298K):  $\delta$  1.20-1.22 (*m*, 24H, CH(CH<sub>3</sub>)<sub>2</sub>), 2.02 (*s*, 6H, CH<sub>3</sub>,*m*-xylene), 2.25-2.41 (*m*, 4H, CH(CH<sub>3</sub>)<sub>2</sub>), 6.74-6.76 (*m*, 2H, Ph), 6.86-6.90 (*m*, 1H, Ph), 6.94 (*s*, 1H, Ph), 7.37 (*s*, 4H, *J*= 7.8Hz, Ph) 7.60 (*t*, 2H, *J*= 7.8Hz, Ph) ppm. <sup>13</sup>C{<sup>1</sup>H} NMR (100.613 MHz, CDCl<sub>3</sub>, 298 K):  $\delta$  21.04, 24.07, 24.38, 28.65, 124.37, 124.44, 131.13, 134.03, 137.93, 145.43 ppm. <sup>19</sup>F{<sup>1</sup>H} NMR (376.49 MHz, CDCl<sub>3</sub>, 298):  $\delta$  -160.86 (br) ppm. MALDI:  $m/z$   $[C_{36}H_{49}CuN_2]^+$ : 451.35  $[M-Me_2C_6H_4]$ . Anal Calcd: C, 53.44; H, 6.10; N, 3.46. Found: C, 53.42; H, 6.14; N, 3.57.

### Synthesis of 7:

Acetonitrile (0.05 mL) was added into the solution of **2** (0.413g, 0.5 mmol) in 20 mL DCM. After overnight stirring, the reaction mixture was dried completely and crystallized in DCM/pentane mixture and kept it at 0°C. Colorless block shaped crystals suitable for X-ray analysis was observed after one day. Yield: 0.270g (47%). MP: 110°C. <sup>1</sup>H NMR (400 MHz, CDCl<sub>3</sub>, 298K):  $\delta$  0.32 (*s*, 6H, SiMe<sub>3</sub>), 0.34 (*s*, 6H, SiMe<sub>3</sub>), 0.37 (*s*, 6H, SiMe<sub>3</sub>), 0.45 (*s*, 6H, SiMe<sub>3</sub>), 0.47 (*s*, 6H, SiMe<sub>3</sub>), 0.55 (*s*, 6H, SiMe<sub>3</sub>), 1.24 (*s*, 12H, CMe<sub>3</sub>), 1.26 (*s*, 12H, CMe<sub>3</sub>), 1.30 (*s*, 12H, CMe<sub>3</sub>), 2.21 (acetonitrile), 7.17-7.19 (*m*, 1H, Ph), 7.36-7.39 (*m*, 1H, Ph), 7.44-7.47 (*m*, 1H, Ph), 7.52-7.63 (*m*, 7H, Ph) ppm. <sup>13</sup>C{<sup>1</sup>H} NMR (100.613 MHz, CDCl<sub>3</sub>, 298 K):  $\delta$  4.54, 4.69, 4.85, 5.69, 5.87, 5.92, 6.25, 31.66,

31.84, 31.88, 54.74, 54.81, 55.10, 116.88, 116.93, 125.28, 126.57, 127.64, 127.70, 127.83, 127.97, 128.21, 128.28, 128.48, 128.77, 129.03, 130.26, 130.53, 130.81, 131.02, 131.37 ppm.  $^{29}\text{Si}\{^1\text{H}\}$  NMR (79.495 MHz,  $\text{CDCl}_3$ , 298 K):  $\delta$  10.22 ( $\text{SiMe}_3$ ) (br), 7.09 ( $\text{SiMe}_3$ ) (br), 5.53 ( $\text{SiN}(\text{SiMe}_3)_2$ ), 4.11 ( $\text{SiN}(\text{SiMe}_3)_2$ ) ppm. Anal Calcd: C, 44.29; H, 7.26; N, 7.38. Found: C, 44.32; H, 7.21; N, 7.46.

### Synthesis of 8:

IPr carbene (0.194g, 0.5 mmol) was dissolved in toluene and added to the solution of **2** (0.413g, 0.5 mmol) in toluene. After overnight stirring, the reaction mixture was filtered and dried completely. Further the reaction mixture was crystallized in DCM/pentane mixture and kept it at  $0^\circ\text{C}$ . Colorless block shaped crystals suitable for X-ray analysis was observed after one day. Yield: 0.320g (58%). Mp:  $185^\circ\text{C}$  (decomposed).  $^1\text{H}$  NMR (400 MHz,  $\text{CDCl}_3$ , 298K):  $\delta$  0.03 (*s*, 9H,  $\text{SiMe}_3$ ), 0.21 (*s*, 9H,  $\text{SiMe}_3$ ), 0.90 (*s*, 18H,  $\text{CMe}_3$ ), 1.22 (*d*,  $J = 6.8$ , 12H,  $\text{CH}(\text{CH}_3)_2$ ), 1.35 (*d*,  $J = 6.8$ , 12H,  $\text{CH}(\text{CH}_3)_2$ ), 2.65-2.76 (*m*, 4H,  $\text{CH}(\text{CH}_3)_2$ ), 6.90-6.97 (*m*, 1H, Ph), 7.25-7.26 (*m*, 1H, Ph), 7.32-7.35 (*m*, 5H, Ph), 7.43-7.59 (*m*, 6H, Ph) ppm.  $^{13}\text{C}\{^1\text{H}\}$  NMR (100.613 MHz,  $\text{CDCl}_3$ , 298 K):  $\delta$  4.81, 5.41, 24.53, 24.64, 28.82, 31.52, 54.19, 124.48, 124.94, 127.90, 128.29, 128.62, 129.99, 131.03, 131.30, 134.98, 145.38, 169.88 ppm.  $^{29}\text{Si}\{^1\text{H}\}$  NMR (79.495 MHz,  $\text{CDCl}_3$ , 298 K):  $\delta$  4.24 ( $\text{SiMe}_3$ ), 3.97 ( $\text{SiMe}_3$ ), 3.60 ( $\text{SiN}(\text{SiMe}_3)_2$ ) ppm.  $^{19}\text{F}\{^1\text{H}\}$  NMR (376.49 MHz,  $\text{CDCl}_3$ , 298):  $\delta$  -179.02 (br) ppm. MALDI:  $m/z$  [ $\text{C}_{48}\text{H}_{77}\text{CuN}_5\text{Si}_3$ ] $^+$ : 871.60 [ $\text{M}$ ] $^+$ . Anal Calcd: C, 52.05; H, 7.01; N, 6.32. Found: C, 52.24; H, 7.17; N, 6.39.

### Synthesis of 9:

Acetonitrile (0.05 mL) was added into the solution of **5** (0.397g, 0.5 mmol) in 20 mL DCM. After overnight stirring, the reaction mixture was dried completely and crystallized in DCM/pentane mixture and kept it at  $0^\circ\text{C}$ . Colorless triangle shaped crystals suitable for X-ray analysis was

observed after one day. Yield: 0.260g (67%). Mp: 121°C. <sup>1</sup>H NMR (400 MHz, CDCl<sub>3</sub>, 298K): δ 1.26 (dd, *J*= 6.8, 3.6, 24H, CH(CH<sub>3</sub>)<sub>2</sub>), 2.07 (s, 6H, CH<sub>3</sub>,*acetonitrile*), 2.46-2.57 (m, 4H, CH(CH<sub>3</sub>)<sub>2</sub>), 7.16-7.21 (m, 2H, CH<sub>imidazole</sub>), 7.36 (d, 4H, *J*= 7.8 Hz, Ph), 7.57 (t, *J*= 7.8Hz, 2H, Ph) ppm. <sup>13</sup>C {<sup>1</sup>H} NMR (100.613 MHz, CDCl<sub>3</sub>, 298 K): δ 21.46, 23.91, 24.69, 28.72, 123.78, 124.31, 125.29, 128.22, 129.03, 130.83, 137.87, 145.60 ppm. <sup>19</sup>F {<sup>1</sup>H} NMR (376.49 MHz, CDCl<sub>3</sub>, 298): δ 179.39 (br) ppm. MALDI: *m/z* [C<sub>31</sub>H<sub>42</sub>CuN<sub>4</sub>]<sup>+</sup>: 533.29 [M]<sup>+</sup>. Anal Calcd: C, 48.36; H, 5.50; N, 7.28. Found: C, 48.42; H, 5.34; N, 7.19.

### Catalytic Reactions:

#### Synthesis of Azides:

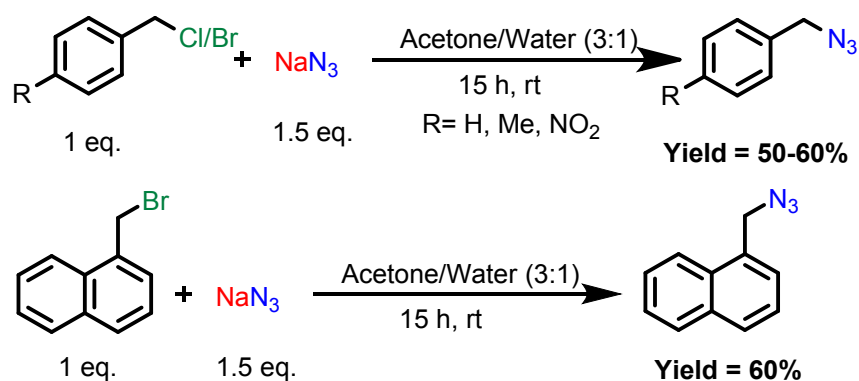

**Scheme S1.** Schematic representation of the azides synthesis.

**General reaction procedure for triazole synthesis:** Catalyst (0.5 mol%) was taken in a catalysis tube inside the glove box and 2 mL dry toluene was added into this. Azide (0.2 mmol) and terminal acetylene substituted compound (0.2 mmol) were added into the catalysis tube and the reaction mixture was stirred at 25°C for 5 hours. After 5 hours, the solvent was evaporated by using rota and solid product was obtained.

**Table S1.** Optimization of reaction conditions for CuAAC reaction using catalyst **2**.<sup>a</sup>

|           | Catalyst (mol %) | Solvent        | Temp.     | Time     | Conversion Yield (%) <sup>b</sup> |
|-----------|------------------|----------------|-----------|----------|-----------------------------------|
| 1.        | 1                | THF            | 25        | 10       | 93                                |
| 2.        | 0.5              | THF            | 25        | 10       | 92                                |
| 3.        | 1                | Toluene        | 25        | 10       | >98                               |
| 4.        | 0.5              | Toluene        | 25        | 10       | 98                                |
| <b>5.</b> | <b>0.5</b>       | <b>Toluene</b> | <b>25</b> | <b>5</b> | <b>98</b>                         |
| 6.        | 0.5              | Toluene        | 25        | 3        | 82                                |
| 7.        | 0.5              | Toluene        | 25        | 1        | 60                                |
| 8.        | 0.5              | Toluene        | 50        | 3        | >99                               |
| 9.        | 0.5              | Toluene        | 50        | 1        | 80                                |

<sup>a</sup>Reaction conditions for CuAAC reaction: benzyl azide (0.2 mmol), phenyl acetylene (0.2 mmol), solvent (2 mL), catalyst **2**, <sup>b</sup><sup>1</sup>H NMR spectroscopy was used to determine the conversion yield of the products.

**NMR spectroscopic data of the catalysis products:**

**I<sup>2</sup>.** <sup>1</sup>H NMR (400 MHz, CDCl<sub>3</sub>): δ 5.58 (s, 2H), 7.33-7.29 (m, 3H), 7.42-7.36 (m, 5H), 7.66 (s, 1H), 7.81-7.78 (m, 2H).

**I<sup>5</sup>.** <sup>1</sup>H NMR (400 MHz, CDCl<sub>3</sub>): δ 5.55 (s, 2H), 7.33-7.30 (m, 5H), 7.39-7.35 (m, 3H), 7.67-7.65 (m, 2H), 7.75 (s, 1H).

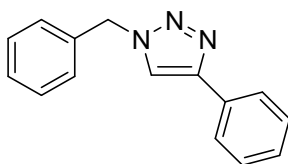

**1-benzyl-4-phenyl-1H-1,2,3-triazole**

**II<sup>2</sup>.** <sup>1</sup>H NMR (400 MHz, CDCl<sub>3</sub>): δ 5.55 (s, 2H), 7.30-7.28 (m, 2H), 7.42-7.34 (m, 5H), 7.56 (s, 1H), 7.65-7.64 (m, 1H).

**II<sup>5</sup>**. <sup>1</sup>H NMR (400 MHz, CDCl<sub>3</sub>): δ 5.54 (*s*, 2H), 7.31-7.28 (*m*, 2H), 7.35-7.33 (*m*, 1H), 7.39-7.36 (*m*, 4H), 7.59-7.58 (*m*, 2H).

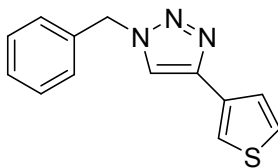

**1-benzyl-4-(thiophen-3-yl)-1H-1,2,3-triazole**

**III<sup>2</sup>**. <sup>1</sup>H NMR (400 MHz, CDCl<sub>3</sub>): δ 0.93-0.89 (*t*, 3H), 1.40-1.31 (*m*, 2H), 1.66-1.58 (*m*, 2H), 2.68 (*t*, 2H), 5.49 (*s*, 2H), 7.18 (*s*, 1H), 7.26-7.24 (*m*, 2H), 7.38-7.34 (*m*, 3H).

**III<sup>5</sup>**. <sup>1</sup>H NMR (400 MHz, CDCl<sub>3</sub>): δ 0.90 (*t*, 3H), 1.39-1.30 (*m*, 2H), 1.65-1.57 (*m*, 2H), 2.67 (*t*, 2H), 5.48 (*s*, 2H), 7.18 (*s*, 1H), 7.25-7.21 (*m*, 2H), 7.38-7.31 (*m*, 3H).

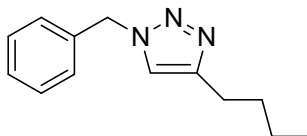

**1-benzyl-4-butyl-1H-1,2,3-triazole**

**IV<sup>2</sup>**. <sup>1</sup>H NMR (400 MHz, CDCl<sub>3</sub>): δ 0.29 (*s*, 9H), 5.55 (*s*, 2H), 7.33-7.33 (*m*, 1H), 7.39-7.36 (*m*, 4H), 7.42 (*s*, 1H).

**IV<sup>5</sup>**. <sup>1</sup>H NMR (400 MHz, CDCl<sub>3</sub>): δ 0.21 (*s*, 9H), 5.53 (*s*, 2H), 7.39-7.33 (*m*, 5H), 7.59 (*s*, 1H).

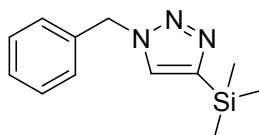

**1-benzyl-4-(trimethylsilyl)-1H-1,2,3-triazole**

**V<sup>2</sup>**. <sup>1</sup>H NMR (400 MHz, CDCl<sub>3</sub>): δ 6.01 (*s*, 2H), 7.31-7.28 (*m*, 1H), 7.39-7.35 (*m*, 2H), 7.56-7.47 (*m*, 5H), 7.77-7.75 (*m*, 2H), 7.94-7.91 (*m*, 2H), 8.04-8.02 (*m*, 1H).

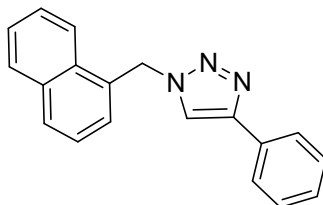

**1-(naphthalen-1-ylmethyl)-4-phenyl-1H-1,2,3-triazole**



**VI**<sup>2</sup>. <sup>1</sup>H NMR (400 MHz, CDCl<sub>3</sub>): δ 5.97 (*s*, 2H), 7.30-7.28 (*m*, 1H), 7.35-7.33 (*m*, 1H), 7.53-7.42 (*m*, 5H), 7.58-7.57 (*m*, 1H), 7.92-7.88 (*m*, 2H), 8.00-7.98 (*m*, 1H).

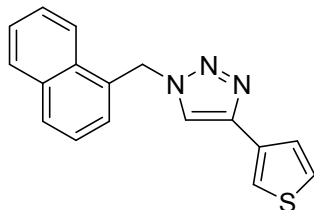

**1-(naphthalen-1-ylmethyl)-4-(thiophen-3-yl)-1H-1,2,3-triazole**

**VII**<sup>2</sup>. <sup>1</sup>H NMR (400 MHz, CDCl<sub>3</sub>): δ 5.94 (*s*, 2H), 7.39-7.61 (*m*, 5H), 7.87-7.92 (*m*, 2H), 8.03-8.06 (*d*, 1H).

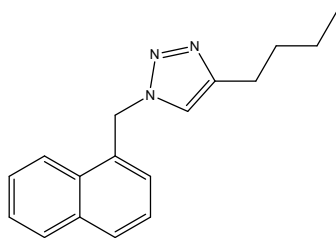

**4-butyl-1-(naphthalen-1-ylmethyl)-1H-1,2,3-triazole**

**VIII**<sup>2</sup>. <sup>1</sup>H NMR (400 MHz, CDCl<sub>3</sub>): δ 6.01 (*s*, 2H), 7.40-7.51 (*m*, 3H), 7.53-7.61 (*m*, 2H), 7.86-7.92 (*m*, 2H), 8.03-8.06 (*d*, 1H).

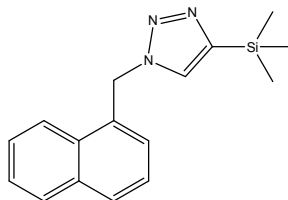

**1-(naphthalen-1-ylmethyl)-4-(trimethylsilyl)-1H-1,2,3-triazole**

**IX**<sup>2</sup>. <sup>1</sup>H NMR (400 MHz, CDCl<sub>3</sub>): δ 2.36 (*s*, 3H), 5.52 (*s*, 2H), 7.18-7.22 (*m*, 4H), 7.29-7.32 (*m*, 1H), 7.37-7.41 (*m*, 2H), 7.64 (*s*, 1H), 7.78-7.80 (*d*, 2H).

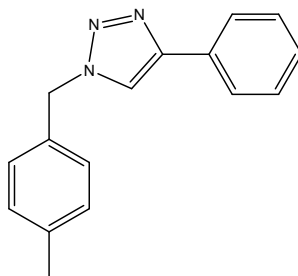

**1-(4-methylbenzyl)-4-phenyl-1H-1,2,3-triazole**

**X<sup>2</sup>**. <sup>1</sup>H NMR (400 MHz, CDCl<sub>3</sub>): δ2.35 (s, 3H), 5.51 (s, 2H), 7.17-7.21 (m, 4H), 7.33-7.35 (m, 1H), 7.40-7.41 (m, 1H), 7.54 (s, 1H), 7.63-7.64 (d, 1H).

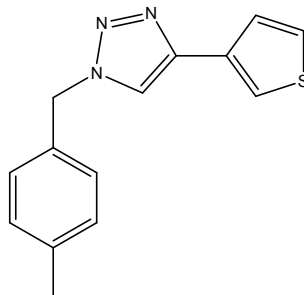

**1-(4-methylbenzyl)-4-(thiophen-3-yl)-1H-1,2,3-triazole**

**XI<sup>2</sup>**. <sup>1</sup>H NMR (400 MHz, CDCl<sub>3</sub>): δ5.69 (s, 2H), 7.38-7.44 (m, 2H), 7.47-7.49 (d, 1H), 7.54-7.56 (d, 1H), 7.79-7.81 (d, 2H), 8.19-8.23 (m, 4H).

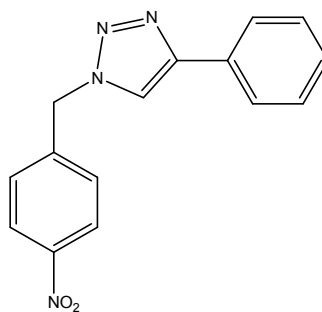

**1-(4-nitrobenzyl)-4-phenyl-1H-1,2,3-triazole**

**XII<sup>2</sup>**. <sup>1</sup>H NMR (400 MHz, CDCl<sub>3</sub>): δ5.68 (s, 2H), 7.22-7.44 (m, 1H), 7.48-7.50 (d, 1H), 7.55-7.57 (d, 1H), 7.67-7.69 (m, 1H), 8.19-8.24 (m, 4H),

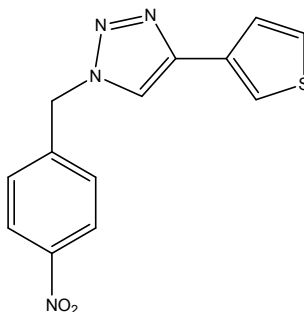

**1-(4-nitrobenzyl)-4-(thiophen-3-yl)-1H-1,2,3-triazole**

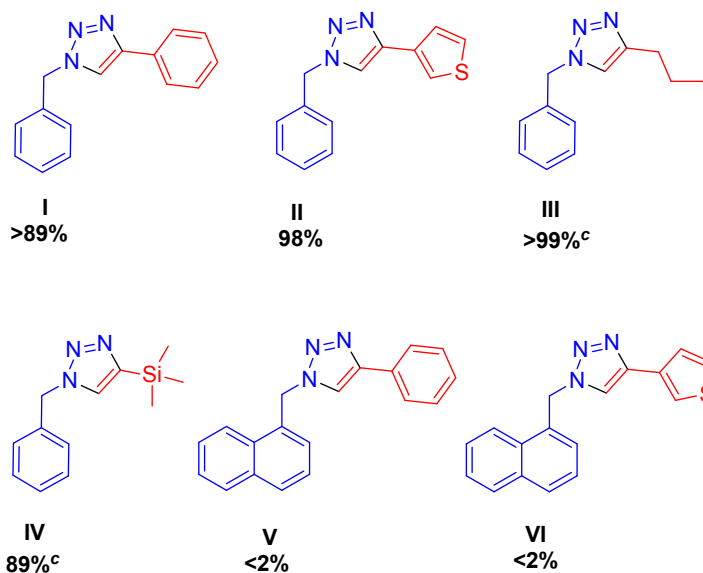

**Scheme S2.** Substrate scope for triazole synthesis using catalyst **5**.<sup>a</sup>

<sup>a</sup>Reaction condition: azide (0.2 mmol), alkyne (0.2 mmol), toluene (2 mL) as solvent at room temperature. <sup>1</sup>H NMR spectroscopy was used to determine the conversion yield of the product; <sup>c</sup>heat the reaction at 50°C.

## S2. Crystal Data and Structure Refinements for **2**, **3**, **5**, **6**, **8** and **9**:

Crystal data for **3**, **4**, **5**, **6**, **8** and **9** were collected on a Bruker Smart Apex Duo diffractometer at 100 K using Mo K<sub>α</sub> radiation ( $\lambda = 0.71073 \text{ \AA}$ ). The absorption correction was done using multi-scan method (SADABS). The structures were solved by direct methods and refined by full-matrix least-squares methods against F<sup>2</sup> (SHELXL-2014/6). Crystallographic data file (including structure factors) for the **2**, **3**, **5**, **6**, **8** and **9** have been deposited with the Cambridge Crystallographic Data Centre. 1896663 (**2**), 1896664 (**3**), 1896665 (**5**), 1886948 (**6**), 1896666 (**8**), 1896670 (**9**)

**Table S2.**

|  |          |          |          |
|--|----------|----------|----------|
|  | <b>2</b> | <b>3</b> | <b>5</b> |
|--|----------|----------|----------|

|                                            |                                                                                   |                                                                                   |                                                                    |
|--------------------------------------------|-----------------------------------------------------------------------------------|-----------------------------------------------------------------------------------|--------------------------------------------------------------------|
| <b>Chemical formula</b>                    | C <sub>28</sub> H <sub>49</sub> CuF <sub>6</sub> N <sub>3</sub> SbSi <sub>3</sub> | C <sub>29</sub> H <sub>51</sub> CuF <sub>6</sub> N <sub>3</sub> SbSi <sub>3</sub> | C <sub>34</sub> H <sub>44</sub> CuF <sub>6</sub> N <sub>2</sub> Sb |
| <b>Formula weight</b>                      | 811.26                                                                            | 825.29                                                                            | 780.00                                                             |
| <b>Temperature</b>                         | 100(2)                                                                            | 100(2)                                                                            | 100(2)                                                             |
| <b>Wavelength</b>                          | 0.71073                                                                           | 0.71073                                                                           | 0.71073                                                            |
| <b>Crystal system</b>                      | orthorhombic                                                                      | monoclinic                                                                        | monoclinic                                                         |
| <b>Space group</b>                         | <i>P</i> 2 <sub>1</sub> 2 <sub>1</sub> 2 <sub>1</sub>                             | <i>P</i> n                                                                        | <i>C</i> c                                                         |
| <b>Unit cell dimensions</b>                | a=11.762(6) Å                                                                     | a=9.226(7) Å                                                                      | a=24.087(2) Å                                                      |
|                                            | b=14.725(7) Å                                                                     | b=11.541(9) Å                                                                     | b=9.1915(9) Å                                                      |
|                                            | c=21.300(9) Å                                                                     | c=18.052(14) Å                                                                    | c=19.165(3) Å                                                      |
|                                            | α=90°                                                                             | α=90°                                                                             | α=90°                                                              |
|                                            | β=90°                                                                             | β=98.414(18)°                                                                     | β=124.966(2)°                                                      |
|                                            | γ=90°                                                                             | γ=90°                                                                             | γ=90°                                                              |
| <b>Volume</b>                              | 3689(3) Å <sup>3</sup>                                                            | 1901(2) Å <sup>3</sup>                                                            | 3477.2(7) Å <sup>3</sup>                                           |
| <b>Z</b>                                   | 4                                                                                 | 2                                                                                 | 4                                                                  |
| <b>Density (calculated)</b>                | 1.461 g/cm <sup>3</sup>                                                           | 1.442 g/cm <sup>3</sup>                                                           | 1.490 g/cm <sup>3</sup>                                            |
| <b>Absorption coefficient</b>              | 1.458 mm <sup>-1</sup>                                                            | 1.416 mm <sup>-1</sup>                                                            | 1.446 mm <sup>-1</sup>                                             |
| <b>F(000)</b>                              | 1656                                                                              | 844                                                                               | 1584                                                               |
| <b>Theta range for data collection</b>     | 2.22 to 25.25°                                                                    | 2.23 to 24.00°                                                                    | 2.20 to 25.25°                                                     |
| <b>Reflections collected</b>               | 81475                                                                             | 39863                                                                             | 43896                                                              |
| <b>Independent reflections</b>             | 6657[R(int)=0.0983]                                                               | 5967[R(int)=0.2784]                                                               | 6285[R(int)=0.1028]                                                |
| <b>Coverage of independent reflections</b> | 99.9%                                                                             | 99.9%                                                                             | 100%                                                               |

|                                             |                                                               |                                                               |                                                            |
|---------------------------------------------|---------------------------------------------------------------|---------------------------------------------------------------|------------------------------------------------------------|
| <b>Data/<br/>restraints/<br/>parameters</b> | 6657/ 24/ 392                                                 | 5967/ 98/ 403                                                 | 6285/ 8/ 406                                               |
| <b>Goodness-of-fit<br/>on F2</b>            | 1.049                                                         | 1.012                                                         | 1.003                                                      |
| <b><math>\Delta/\sigma</math> max</b>       | 0.001                                                         | 0.023                                                         | 0.004                                                      |
| <b>Final R indices</b>                      | 5034 data; [ $I > 2\sigma(I)$ ]<br>R1= 0.0442, wR2=<br>0.0931 | 2797 data; [ $I > 2\sigma(I)$ ]<br>R1= 0.0841, wR2=<br>0.1605 | 4635 data; [ $I > 2\sigma(I)$ ] R1=<br>0.0449, wR2= 0.0735 |
|                                             | all data, R1= 0.0748,<br>wR2= 0.1065                          | all data, R1= 0.2138,<br>wR2= 0.2103                          | all data, R1= 0.0840, wR2=<br>0.0860                       |
| <b>Largest diff.<br/>peak and hole</b>      | 0.567 and -0.420 eÅ <sup>-3</sup>                             | 0.959 and -0.528 eÅ <sup>-3</sup>                             | 0.724 and -0.446 eÅ <sup>-3</sup>                          |
| <b>R. M. S<br/>deviation from<br/>mean</b>  | 0.073 eÅ <sup>-3</sup>                                        | 0.111 eÅ <sup>-3</sup>                                        | 0.085 eÅ <sup>-3</sup>                                     |

|                                 | <b>6</b>                                                           | <b>8</b>                                                                                          | <b>9</b>                                                           |
|---------------------------------|--------------------------------------------------------------------|---------------------------------------------------------------------------------------------------|--------------------------------------------------------------------|
| <b>Chemical<br/>formula</b>     | C <sub>35</sub> H <sub>46</sub> CuF <sub>6</sub> N <sub>2</sub> Sb | C <sub>49</sub> H <sub>79</sub> Cl <sub>2</sub> CuF <sub>6</sub> N <sub>5</sub> SbSi <sub>3</sub> | C <sub>38</sub> H <sub>50</sub> CuF <sub>6</sub> N <sub>4</sub> Sb |
| <b>Formula weight</b>           | 794.03                                                             | 1192.63                                                                                           | 862.11                                                             |
| <b>Temperature</b>              | 100(2)                                                             | 100(2)                                                                                            | 100(2)                                                             |
| <b>Wavelength</b>               | 0.71073                                                            | 0.71073                                                                                           | 0.71073                                                            |
| <b>Crystal system</b>           | orthorhombic                                                       | monoclinic                                                                                        | orthorhombic                                                       |
| <b>Space group</b>              | <i>Pbca</i>                                                        | <i>P2<sub>1</sub>/n</i>                                                                           | <i>Pnma</i>                                                        |
| <b>Unit cell<br/>dimentions</b> | a=18.355(3) Å                                                      | a= 21.510(7) Å                                                                                    | a=13.623(5) Å                                                      |
|                                 | b=18.334(3) Å                                                      | b= 12.624(4) Å                                                                                    | b=14.768(5) Å                                                      |
|                                 | c=42.496(6) Å                                                      | c= 21.590(7) Å                                                                                    | c=20.118(7) Å                                                      |
|                                 | $\alpha = 90^\circ$                                                | $\alpha = 90^\circ$                                                                               | $\alpha = 90^\circ$                                                |
|                                 | $\beta = 90^\circ$                                                 | $\beta = 96.299(9)^\circ$                                                                         | $\beta = 90^\circ$                                                 |
|                                 | $\gamma = 90^\circ$                                                | $\gamma = 90^\circ$                                                                               | $\gamma = 90^\circ$                                                |

|                                            |                                              |                                              |                                              |
|--------------------------------------------|----------------------------------------------|----------------------------------------------|----------------------------------------------|
| <b>Volume</b>                              | 14301(4) Å <sup>3</sup>                      | 5827(3) Å <sup>3</sup>                       | 4047(2) Å <sup>3</sup>                       |
| <b>Z</b>                                   | 18                                           | 4                                            | 4                                            |
| <b>Density (calculated)</b>                | 1.660 g/cm <sup>3</sup>                      | 1.359 g/cm <sup>3</sup>                      | 1.415 g/cm <sup>3</sup>                      |
| <b>Absorption coefficient</b>              | 1.583 mm <sup>-1</sup>                       | 1.037 mm <sup>-1</sup>                       | 1.251 mm <sup>-1</sup>                       |
| <b>F(000)</b>                              | 7272                                         | 2472                                         | 1760                                         |
| <b>Theta range for data collection</b>     | 2.22 to 25.25                                | 2.15 to 25.25°                               | 2.27 to 25.24°                               |
| <b>Reflections collected</b>               | 177708                                       | 109049                                       | 139751                                       |
| <b>Independent reflections</b>             | 12935 [R(int)= 0.1740 ]                      | 10536 [R(int)= 0.0648]                       | 3812 [R(int)= 0.1906]                        |
| <b>Coverage of independent reflections</b> | 99.9%                                        | 99.9%                                        | 99.9%                                        |
| <b>Data/ restraints/ parameters</b>        | 12935/ 0/ 831                                | 10536/ 0/ 624                                | 3812/ 0/ 250                                 |
| <b>Goodness-of-fit on F<sup>2</sup></b>    | 1.039                                        | 1.047                                        | 1.001                                        |
| <b>Δ/ σ max</b>                            | 0.002                                        | 0.058                                        | 0.001                                        |
| <b>Final R indices</b>                     | 7894 data; [I>2σ(I)] R1= 0.0479, wR2= 0.0681 | 8198 data; [I>2σ(I)] R1= 0.0531, wR2= 0.1267 | 2659 data; [I>2σ(I)] R1= 0.0394, wR2= 0.0588 |
|                                            | all data, R1= 0.1107, wR2= 0.0848            | all data, R1= 0.0745, wR2= 0.1449            | all data, R1= 0.0787, wR2= 0.0712            |
| <b>Largest diff. peak and hole</b>         | 0.941 and -0.950 eÅ <sup>-3</sup>            | 1.180 and -1.616 eÅ <sup>-3</sup>            | 0.751 and -0.651 eÅ <sup>-3</sup>            |
| <b>R. M. S deviation from mean</b>         | 0.100 eÅ <sup>-3</sup>                       | 0.138 eÅ <sup>-3</sup>                       | 0.092 eÅ <sup>-3</sup>                       |

### S3. Hapticity Deduction of hapticities in 2, 3, 5 and 6.

The assignment of hapticity number for the complexes having low hapticities ( $\eta^1$ -  $\eta^3$ ), has always been a complicated task as the difference between M-C bond distances are very less. Therefore,

we used a method proposed by Alvarez and coworkers to deduce the hapticity of the metal-arene complexes given in *Organometallics*, 2014, **33**, 6660-6668.

**Table S3.** Deduction of hapticities in **2**, **3**, **5** and **6**.

|          | M-C <sup>a</sup>                             | $\rho_1^b$ | $\rho_2^c$ | $\eta^d$ |
|----------|----------------------------------------------|------------|------------|----------|
|          | d <sub>1</sub> d <sub>2</sub> d <sub>3</sub> |            |            |          |
| <b>2</b> | 2.23, 2.33, 2.43                             | 1.044      | 1.089      | 3        |
| <b>3</b> | 2.16, 2.19, 2.57                             | 1.013      | 1.189      | 2        |
| <b>5</b> | 2.06, 2.31, 2.32                             | 1.121      | 1.126      | 3        |
| <b>6</b> | 2.19, 2.22, 2.42                             | 1.013      | 1.105      | 2        |

<sup>a</sup> M (=Cu), d<sub>1</sub><d<sub>2</sub><d<sub>3</sub>, <sup>b</sup> $\rho_1 = d_2/d_1$ , <sup>c</sup> $\rho_2 = d_3/d_1$ , if  $\rho_1 \approx \rho_2 \gg 1$  then  $\eta^1$ , if  $\rho_2 > \rho_1 \approx 1$  then  $\eta^2$ , and if  $\rho_1 \approx \rho_2 \approx 1$  then  $\eta^3$

#### S4. Computational Methodology

All the geometry optimizations were performed with Gaussian 09 program<sup>1</sup> using BP86<sup>2</sup>/def2-SVP basis set.<sup>3</sup> Meta-GGA exchange correlation functional M06<sup>4</sup> with def2-TZVPP basis set<sup>3</sup> was used for the single point calculations on the optimized geometries and the energies were corrected by adding the zero point energies from the BP86/def2-SVP level of theory. The optimization of **2**, **3**, and **5** using metaGGA functional M06<sup>4</sup> and GGA functional with D3BJ dispersion correction by Grimme (BP86-D3-BJ)<sup>5</sup> also leads to the  $\eta^2$ -coordination of the arene ring. The optimization of **6** using metaGGA functional M06<sup>4</sup> leads to  $\eta^3$ -coordination and GGA functional with D3BJ dispersion correction by Grimme (BP86-D3-BJ)<sup>5</sup> leads to the  $\eta^2$ -coordination of the arene ring. Natural Bond Order (NBO)<sup>6</sup> analysis was done at the same level of theory. The nature of Si/C–Cu as well as Cu–arene bonds were studied using EDA-NOCV method at the BP86/TZ2P level of theory using ADF 2014.01 program.<sup>7</sup> Scalar relativistic effects were incorporated using Zeroth Order Regular Approximation (ZORA).<sup>8</sup> The core electrons were treated by the frozen core approximations. Energy Decomposition Analysis (EDA)<sup>9</sup> gives the

instantaneous interaction energy ( $\Delta E_{\text{int}}$ ) between two fragments in the frozen geometry of the compound. The interaction energy can be divided into three parts:

$$\Delta E_{\text{int}} = \Delta E_{\text{elstat}} + \Delta E_{\text{Pauli}} + \Delta E_{\text{orb}}$$

$\Delta E_{\text{elstat}}$  gives the electrostatic interaction energy between the frozen charge densities of the two fragments.  $\Delta E_{\text{Pauli}}$  is the result of repulsive interaction between two fragments, which are caused by the electrons of same spin.  $\Delta E_{\text{orb}}$  is the lowering in energy due to the overlap of orbitals of the two fragments. Sum of  $\Delta E_{\text{int}}$  and  $\Delta E_{\text{prep}}$  (energy necessary to promote the fragments from their ground state geometry to the geometry in the compound) gives  $-D_e$  (dissociation energy).

$$-D_e = \Delta E_{\text{int}} + \Delta E_{\text{prep}}$$

In the EDA-NOCV analysis method,  $\Delta E_{\text{orb}}$  term is decomposed into the contributions from different natural orbitals of chemical valence (NOCV).<sup>10</sup> It provides the energy contributions for each specific orbital interaction between the fragments to the total bond energy.

**Table S4.** Charges by natural population analysis (M06/def2-TZVPP//BP86/def2-SVP) on atoms and groups of atoms in the optimized geometry of complexes **2** and **3** ( $L^1L^2\text{SiCu}(L)^+$ ) as well as **5** and **6** ( $\text{NHCCu}(L)^+$ ), where  $L^1 = \text{N}(\text{SiMe}_3)_2$ ,  $L^2 = (\text{Ph})\text{C}(\text{N}t\text{-Bu})_2$ , NHC = *N*-heterocyclic carbene with (*i*-Pr)<sub>2</sub>Ph substituent on each N and  $L = \text{Tol} (\text{C}_6\text{H}_5(\text{CH}_3))$  and *m*-Xyl (1,3  $\text{C}_6\text{H}_4(\text{CH}_3)_2$ ).

| $L^1L^2\text{SiCu}(L)^+$ | $L^1$ | $L^2$ | Si   | Cu   | L    |
|--------------------------|-------|-------|------|------|------|
| <b>2</b>                 | -0.53 | -0.36 | 1.43 | 0.27 | 0.18 |
| <b>3</b>                 | -0.53 | -0.35 | 1.43 | 0.29 | 0.16 |
| $\text{NHCCu}(L)^+$      | NHC   | C7    | Cu   | L    | --   |
| <b>5</b>                 | 0.33  | 0.10  | 0.52 | 0.16 | --   |
| <b>6</b>                 | 0.32  | 0.10  | 0.51 | 0.17 | --   |



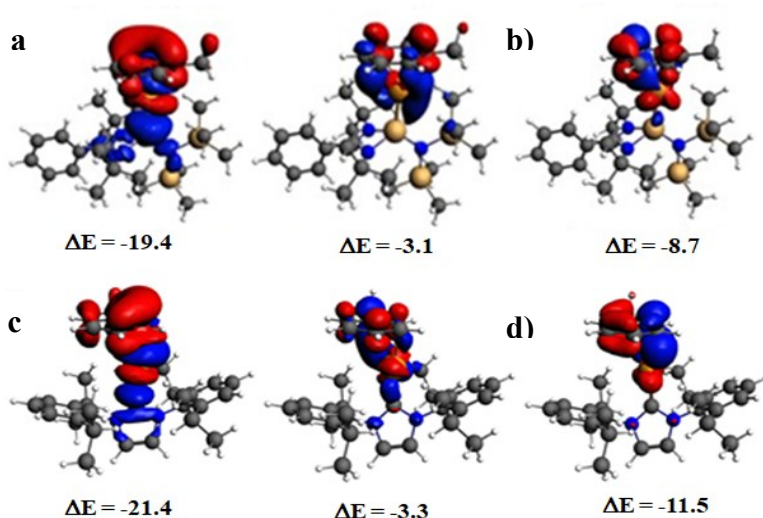

**Figure S1:** Plot of deformation density (BP86/TZ2P) for a) the donation of  $\pi$ -electrons from toluene to the vacant sp-hybrid orbital on Cu (Toluene $\rightarrow$ Cu) in complex **2**, b) the donation from the filled d-orbital of Cu to  $\pi^*$ -MO of toluene in complex **2**, c) the donation of  $\pi$ -electrons from toluene to the vacant sp-hybrid orbital on Cu (Toluene $\rightarrow$ Cu) in complex **5** and d) the donation from the d-orbital of Cu to  $\pi^*$ -MO of toluene in complex **5**. The direction of charge flow is from red to blue. The isosurface value for the plot is 0.0003. The associated energy ( $\Delta E$ ) is given in kcal/mol.

**Table S5.** EDA-NOCV results (BP86/TZ2P) for the interaction of (a)  $L^1L^2Si$  fragment with  $Cu(Xyl)^+$  in **3** ( $L^1L^2SiCu(Xyl)^+$ ) and (b)  $L^1L^2SiCu^+$  fragment with **Xylin 3** ( $L^1L^2SiCu(Xyl)^+$ ) and (c) NHC fragment with  $Cu(Xyl)^+$  in **6** ( $NHCCu(m-Xyl)^+$ ) and (d)  $NHCCu^+$  fragment with **Tol** in **6** ( $NHCCu(m-Xyl)^+$ ), where  $L^1 = N(SiMe_3)_2$  and  $L^2 = (Ph)C(Nt-Bu)_2$ ,  $m-Xyl = 1,3 C_6H_4(CH_3)_2$  and NHC = N-heterocyclic carbene with (i-Pr) $_2$ Ph substituent on each N. Energies are in kcal/mol.

|                                    | (a)<br>$L^1L^2Si\&Cu(Xyl)^+$ | (b)<br>$L^1L^2SiCu^+\&(Xyl)$ | (c)<br>$NHC\&Cu(Xyl)^+$ | (d)<br>$NHCCu^+\&(Xyl)$ |
|------------------------------------|------------------------------|------------------------------|-------------------------|-------------------------|
| $\Delta E_{int}$                   | -92.9                        | -29.1                        | -93.0                   | -37.6                   |
| $\Delta E_{Pauli}$                 | 103.2                        | 77.0                         | 110.3                   | 73.3                    |
| $\Delta E_{elstat}^a$              | -127.5 (65.0%)               | -59.9 (56.5%)                | -141.1 (69.4%)          | -60.5 (54.6%)           |
| $\Delta E_{orb}^a$                 | -68.6 (35.0%)                | -46.2 (43.5%)                | -62.2 (30.6%)           | -50.4 (45.4%)           |
| $\Delta E_{m-Xyl\rightarrow Cu}^b$ | --                           | -22.7 (49.1%)                | --                      | -25.2 (50.0%)           |
| $\Delta E_{Cu\rightarrow m-Xyl}^b$ | --                           | -10.4 (32.3%)                | --                      | -9.2 (27.6%)            |

|                                                    |               |       |               |       |
|----------------------------------------------------|---------------|-------|---------------|-------|
| $\Delta E_{\text{Si/NHC} \rightarrow \text{Cu}}^b$ | -44.4 (64.7%) | --    | -28.5 (45.8%) | --    |
| $\Delta E_{\text{Cu} \rightarrow \text{Si/NHC}}^b$ | -4.6 (6.7%)   | --    | -9.5 (15.3%)  | --    |
| $\Delta E_{\text{rest}}^{b,c}$                     | -19.6         | -13.1 | -24.2         | -16.0 |
| $\Delta E_{\text{prep}}^d$                         | 7.6           | 3.5   | 4.8           | 4.7   |
| $-D_e^d$                                           | 85.3          | 25.6  | -88.2         | -32.9 |

<sup>a</sup>Values in parentheses give the percentage contribution to the total attractive interactions,  $\Delta E_{\text{orb}} + \Delta E_{\text{elstat}}$ . <sup>b</sup>Values in parentheses give the percentage contribution to the orbital interactions,  $\Delta E_{\text{orb}}$ . <sup>c</sup> $\Delta E_{\text{rest}} = \Delta E_{\text{orb}} - (\Delta E_{\text{M} \rightarrow \text{L}} + \Delta E_{\text{L} \rightarrow \text{M}})$ .

<sup>d</sup> $\Delta E_{\text{prep}}$  and  $D_e$  represent the preparatory and dissociation energy respectively.

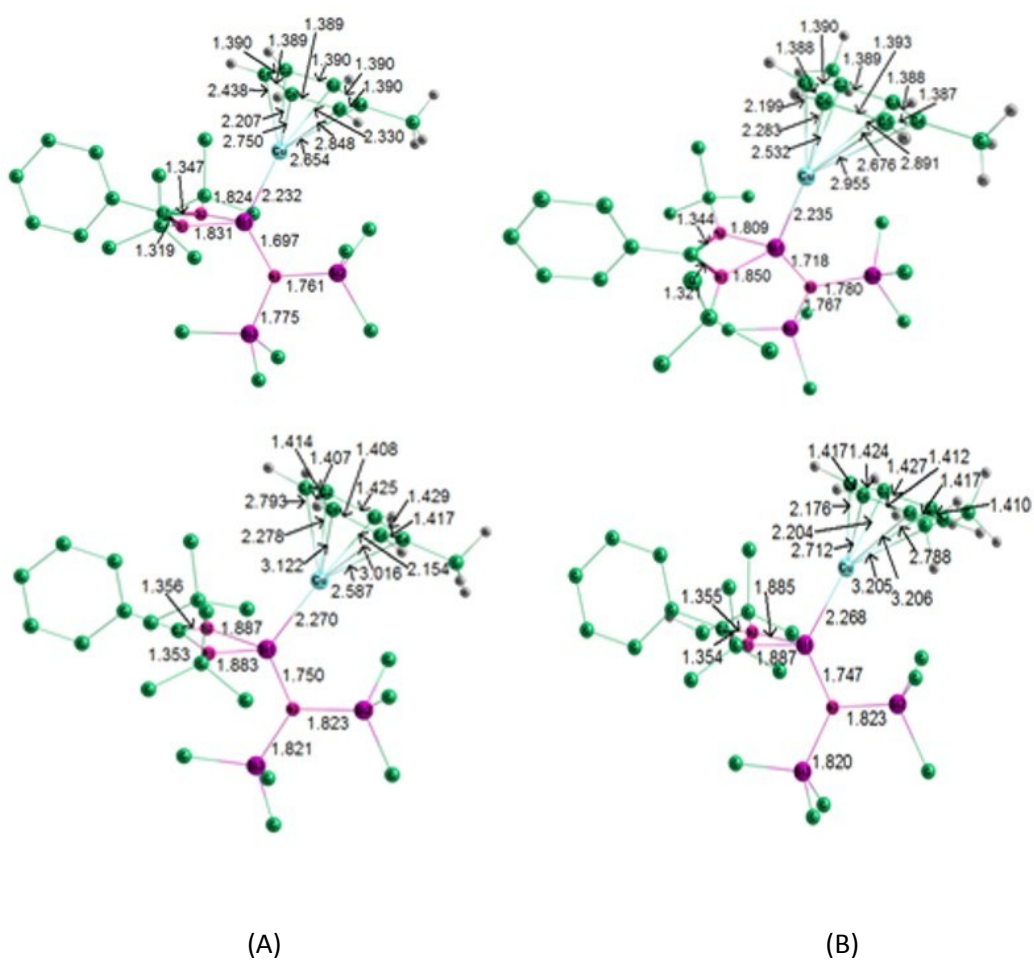

**Figure S2.** a) Experimental and b) optimized (BP86/def2-SVP) geometry of  $2(\text{L}^1\text{L}^2\text{SiCu}(\text{Tol})^+)$  and  $3(\text{L}^1\text{L}^2\text{SiCu}(\text{m-Xyl})^+)$ , where  $\text{L}^1 = \text{N}(\text{SiMe}_3)_2$ ,  $\text{L}^2 = (\text{Ph})\text{C}(\text{N}t\text{-Bu})_2$ ,  $\text{Tol} = \text{C}_6\text{H}_5(\text{CH}_3)$ ,  $\text{m-Xyl} = 1,3 \text{C}_6\text{H}_4(\text{CH}_3)_2$ .

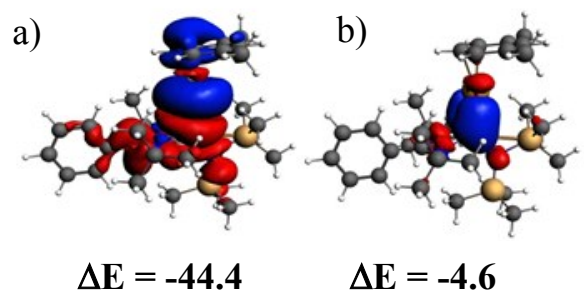

**Figure S3.** Plot of deformation density (BP86/TZ2P) for the interaction of a) donation of lone pair on silylene to Cu (Si→Cu) in **3** and b) back donation from Cu to silylene in **3**. The direction of charge flow is from red to blue. The isosurface value for the plot is 0.0003. The associated energy ( $\Delta E$ ) is given in kcal/mol.

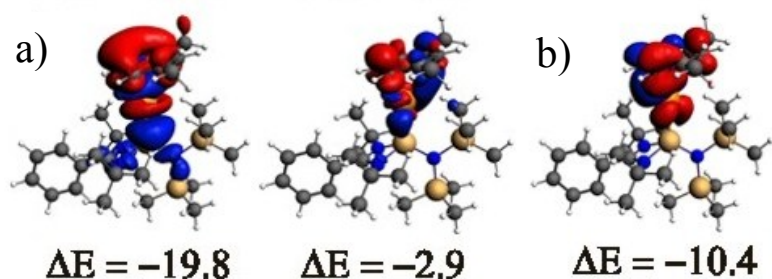

**Figure S4.** Plots of deformation density (BP86/TZ2P) for a) donation from xylene ring to Cu (Xyl→Cu) in **3** and b) donation from Cu to xylene in **3**. The direction of charge flow is from red to blue. The isosurface value for the plot is 0.0003. The associated energy ( $\Delta E$ ) is given in kcal/mol.

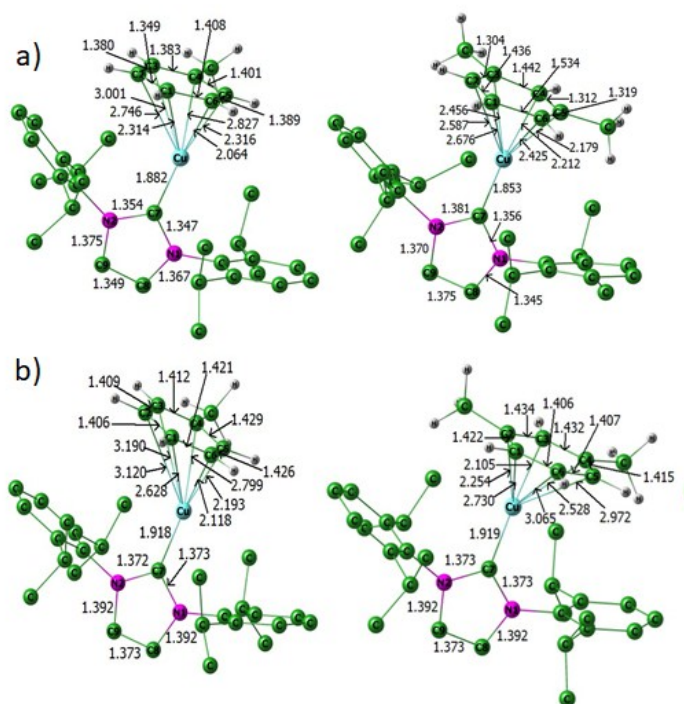

**Figure S5.** a) Experimental geometry as well as b) optimized (BP86/Def2-SVP) geometry of **5** ( $\text{NHCCu}(\text{Tol})^+$ ), **6** ( $\text{NHCCu}(\text{m-Xyl})^+$ ), where NHC = N-heterocyclic carbene with  $(i\text{-Pr})_2\text{Ph}$  substituent on each N, Tol =  $\text{C}_6\text{H}_5(\text{CH}_3)$ , m-Xyl = 1,3  $\text{C}_6\text{H}_4(\text{CH}_3)_2$ . H atoms on NHC are hidden for clarity.

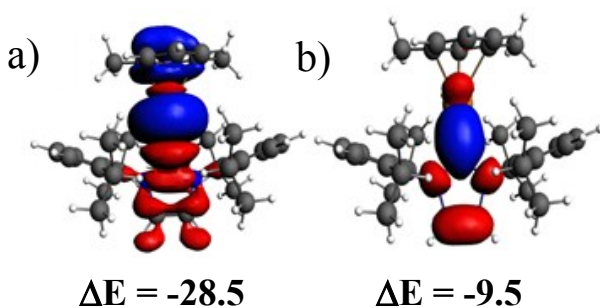

**Figure S6.** Plots of deformation density (BP86/TZ2P) for the interaction of a) donation of lone pair on NHC to Cu ( $\text{NHC} \rightarrow \text{Cu}$ ) in **6** and b) back donation from Cu to NHC in **6**. The direction of charge flow is from red to blue. The isosurface value for the plot is 0.0003. The associated energy ( $\Delta E$ ) is given in kcal/mol.

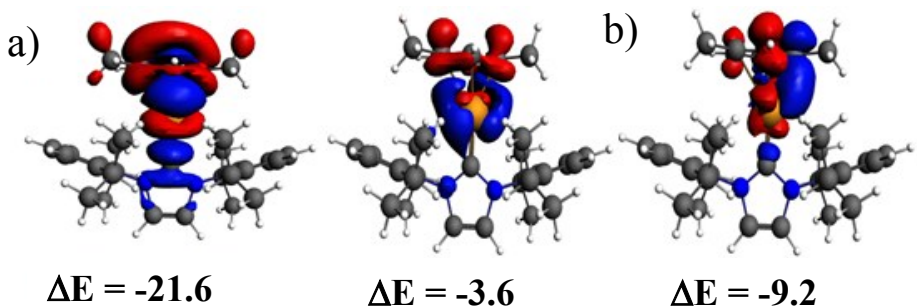

**Figure S7.** Plots of deformation density (BP86/TZ2P) for the interaction a) donation of xylene ring to Cu (Xylene→Cu) in **6** and b) donation from Cu to Xylene in **6**. The direction of charge flow is from red to blue. The isosurface value for the plot is 0.0003. The associated energy ( $\Delta E$ ) is given in kcal/mol.

**Table S6.** Optimized geometry (BP86/def2-SVP), Cartesian coordinates, electronic energy  $E_{M06}^{el}$  (M06/def2-TZVPP//BP86/def2-SVP), zero-point energy  $ZPE_{BP86}$  (BP86/def2-SVP) and total energy  $E$  ( $E_{M06}^{el} + ZPE_{BP86}$ ) of **2** ( $L^1L^2SiCu(Tol)^+$ ), **3** ( $L^1L^2SiCu(m-Xyl)^+$ ), **5** ( $NHCCu(Tol)^+$ ) and **6** ( $NHCCu(m-Xyl)^+$ ) where  $L^1 = N(SiMe_3)_2$ ,  $L^2 = (Ph)C(Nt-Bu)_2$ , Tol =  $C_6H_5(CH_3)$ , m-Xyl = 1,3  $C_6H_4(CH_3)_2$  using Gaussian09 program package. The energies are given in a.u.

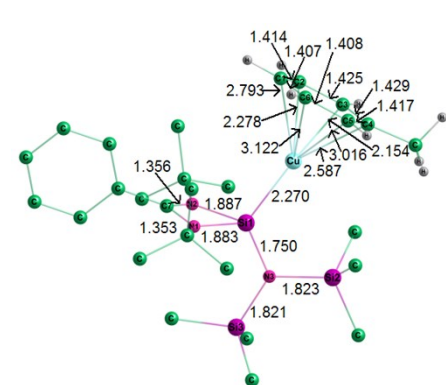

**$L^1L^2SiCu(Tol)^+$**

$E_{M06}^{el} = -3769.271366$

$ZPE_{BP86} = 0.692187$

$E (E_{M06}^{el} + ZPE_{BP86}) = -3768.579179$

|    |              |              |              |
|----|--------------|--------------|--------------|
| C  | -2.974274000 | -2.903213000 | -1.182685000 |
| H  | -3.416854000 | -2.536777000 | -2.123827000 |
| C  | -1.713264000 | -3.565917000 | -1.207536000 |
| H  | -1.174750000 | -3.675988000 | -2.161930000 |
| C  | -1.202192000 | -4.161003000 | -0.030694000 |
| H  | -0.240554000 | -4.695360000 | -0.058013000 |
| C  | -1.942605000 | -4.084552000 | 1.162818000  |
| H  | -1.556809000 | -4.555375000 | 2.080247000  |
| C  | -3.177530000 | -3.408639000 | 1.193963000  |
| H  | -3.745196000 | -3.357920000 | 2.136813000  |
| C  | -3.726378000 | -2.817893000 | 0.028932000  |
| Cu | -1.595921000 | -1.425820000 | -0.437121000 |
| Si | -0.264071000 | 0.370462000  | -0.046010000 |
| Si | -0.032063000 | 3.533563000  | 0.191681000  |
| Si | -2.781685000 | 1.979445000  | 0.040044000  |
| N  | 1.312285000  | 0.255161000  | -1.075944000 |
| N  | 1.206186000  | 0.038330000  | 1.082464000  |
| C  | 1.363574000  | -0.293684000 | 2.525458000  |
| C  | 1.586104000  | 0.096722000  | -2.533550000 |

|   |              |              |              |
|---|--------------|--------------|--------------|
| C | 3.422944000  | -0.645948000 | 0.034599000  |
| C | 2.811010000  | 0.933488000  | -2.962138000 |
| H | 2.668773000  | 2.005212000  | -2.715750000 |
| H | 2.951648000  | 0.854440000  | -4.059242000 |
| H | 3.742025000  | 0.579688000  | -2.478452000 |
| N | -0.959458000 | 1.970509000  | 0.084527000  |
| C | 5.014845000  | -2.498000000 | 0.073999000  |
| H | 5.213446000  | -3.581042000 | 0.076224000  |
| C | 2.020652000  | -0.127944000 | 0.015147000  |
| C | 3.688988000  | -2.033785000 | 0.042266000  |
| H | 2.856280000  | -2.753390000 | 0.014971000  |
| C | 6.083378000  | -1.584776000 | 0.102872000  |
| H | 7.121334000  | -1.951047000 | 0.130263000  |
| C | 5.823594000  | -0.202928000 | 0.096468000  |
| H | 6.656651000  | 0.516582000  | 0.121399000  |
| C | 4.500929000  | 0.268163000  | 0.060440000  |
| H | 4.299882000  | 1.350271000  | 0.065690000  |
| C | 2.701284000  | 0.226160000  | 3.092250000  |
| H | 2.816768000  | 1.314979000  | 2.915985000  |
| H | 3.574330000  | -0.295396000 | 2.656283000  |
| H | 2.723797000  | 0.057423000  | 4.187907000  |
| C | 1.252582000  | -1.822010000 | 2.730704000  |
| H | 2.100987000  | -2.355074000 | 2.257665000  |
| H | 0.305663000  | -2.203547000 | 2.295728000  |
| H | 1.262401000  | -2.067193000 | 3.812663000  |
| C | 0.331744000  | 0.621114000  | -3.261888000 |
| H | 0.139078000  | 1.685311000  | -3.018874000 |
| H | -0.566726000 | 0.032824000  | -2.976536000 |
| H | 0.460477000  | 0.535144000  | -4.358993000 |
| C | 1.799908000  | -1.390104000 | -2.897490000 |
| H | 1.887471000  | -1.504912000 | -3.997240000 |
| H | 0.939246000  | -2.002150000 | -2.554717000 |
| H | 2.724581000  | -1.796239000 | -2.443047000 |
| C | 1.832354000  | 3.241075000  | 0.340514000  |
| H | 2.250069000  | 2.715970000  | -0.540032000 |
| H | 2.104750000  | 2.677159000  | 1.254138000  |
| H | 2.319352000  | 4.237656000  | 0.402465000  |
| C | 0.196667000  | 0.403437000  | 3.254213000  |
| H | -0.783478000 | 0.048885000  | 2.871939000  |
| H | 0.241321000  | 1.503294000  | 3.125946000  |
| H | 0.236158000  | 0.179837000  | 4.338720000  |
| C | -0.535097000 | 4.513215000  | 1.732371000  |
| H | -0.446516000 | 3.897648000  | 2.652092000  |
| H | -1.563683000 | 4.919615000  | 1.690280000  |
| H | 0.154017000  | 5.377629000  | 1.846371000  |
| C | -3.456536000 | 0.966698000  | 1.495666000  |
| H | -3.126165000 | 1.404741000  | 2.460950000  |
| H | -3.117229000 | -0.090804000 | 1.469929000  |
| H | -4.567464000 | 0.970341000  | 1.487323000  |
| C | -0.304574000 | 4.551606000  | -1.383018000 |
| H | 0.095934000  | 4.024633000  | -2.274621000 |
| H | 0.234900000  | 5.519463000  | -1.300567000 |
| H | -1.369736000 | 4.784315000  | -1.581153000 |
| C | -5.105581000 | -2.206699000 | 0.038758000  |
| H | -5.861643000 | -2.979601000 | -0.221249000 |

|   |              |              |              |
|---|--------------|--------------|--------------|
| H | -5.203425000 | -1.390775000 | -0.703893000 |
| H | -5.371718000 | -1.809462000 | 1.037496000  |
| C | -3.373214000 | 1.243908000  | -1.608292000 |
| H | -3.004068000 | 0.202517000  | -1.744411000 |
| H | -3.008608000 | 1.840414000  | -2.470668000 |
| H | -4.482993000 | 1.222425000  | -1.654801000 |
| C | -3.547001000 | 3.702334000  | 0.185987000  |
| H | -3.177305000 | 4.437580000  | -0.555257000 |
| H | -3.435902000 | 4.137166000  | 1.198790000  |
| H | -4.636310000 | 3.576125000  | 0.003376000  |

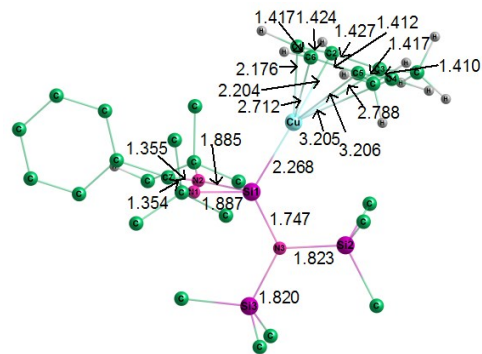

### L<sup>1</sup>L<sup>2</sup>SiCu(m-Xyl)<sup>+</sup>

$$E_{M06}^{el} = -3808.5719326$$

$$ZPE_{BP86} = 0.718221$$

$$E(E_{M06}^{el} + ZPE_{BP86}) = -3807.8537116$$

|   |              |              |              |
|---|--------------|--------------|--------------|
| C | 3.442936000  | -1.194979000 | -0.017386000 |
| C | 3.457667000  | -2.601640000 | -0.151221000 |
| H | 2.511549000  | -3.155080000 | -0.253489000 |
| C | 4.678587000  | -3.297569000 | -0.152380000 |
| H | 4.681164000  | -4.393616000 | -0.257628000 |
| C | 5.890893000  | -2.598657000 | -0.019184000 |
| H | 6.846032000  | -3.146358000 | -0.019898000 |
| C | 5.881248000  | -1.198893000 | 0.115070000  |
| H | 6.828113000  | -0.646759000 | 0.219378000  |
| C | 4.664995000  | -0.496632000 | 0.115214000  |
| H | 4.659857000  | 0.599472000  | 0.215732000  |
| C | 2.156397000  | -0.432044000 | -0.018737000 |
| C | -4.598274000 | -1.982517000 | 0.182983000  |
| H | -5.565009000 | -1.496445000 | 0.395812000  |
| C | -3.893545000 | -2.593547000 | 1.250303000  |
| C | -2.663547000 | -3.225582000 | 0.964044000  |
| H | -2.107872000 | -3.729425000 | 1.770340000  |
| C | -2.159015000 | -3.262001000 | -0.359485000 |
| H | -1.254065000 | -3.849081000 | -0.585035000 |
| C | -2.876638000 | -2.628606000 | -1.413178000 |
| H | -2.531332000 | -2.731635000 | -2.455033000 |
| C | -4.121448000 | -1.984044000 | -1.143982000 |
| C | 1.767686000  | -0.068882000 | -2.558557000 |
| C | 1.441900000  | -1.519838000 | -2.983184000 |

|   |              |              |              |
|---|--------------|--------------|--------------|
| H | 1.494084000  | -1.623776000 | -4.086316000 |
| H | 0.415789000  | -1.792618000 | -2.655692000 |
| H | 2.157347000  | -2.241669000 | -2.541578000 |
| C | 1.471153000  | -0.565693000 | 2.483221000  |
| C | 2.529987000  | 2.933120000  | 0.336056000  |
| H | 2.831132000  | 2.521059000  | -0.647032000 |
| H | 2.749612000  | 2.181585000  | 1.118862000  |
| H | 3.163839000  | 3.823359000  | 0.536672000  |
| C | 0.794677000  | 0.898699000  | -3.262945000 |
| H | 0.985214000  | 1.949456000  | -2.965818000 |
| H | -0.260574000 | 0.654087000  | -3.018643000 |
| H | 0.911136000  | 0.823630000  | -4.362320000 |
| C | -4.940908000 | -1.400911000 | -2.268711000 |
| H | -5.588877000 | -2.187322000 | -2.714313000 |
| H | -4.305019000 | -1.003190000 | -3.084033000 |
| H | -5.606656000 | -0.589474000 | -1.915678000 |
| C | 2.807498000  | -0.118866000 | 3.113871000  |
| H | 2.941669000  | 0.979047000  | 3.033844000  |
| H | 3.676640000  | -0.615691000 | 2.641664000  |
| H | 2.814756000  | -0.381833000 | 4.191119000  |
| C | 0.430948000  | 4.272363000  | 2.078303000  |
| H | 0.670557000  | 3.548873000  | 2.886030000  |
| H | -0.609913000 | 4.617475000  | 2.235837000  |
| H | 1.095514000  | 5.152163000  | 2.215957000  |
| C | 3.215806000  | 0.292951000  | -2.949276000 |
| H | 3.473902000  | 1.320474000  | -2.621632000 |
| H | 3.318762000  | 0.253709000  | -4.052659000 |
| H | 3.954478000  | -0.409609000 | -2.519324000 |
| C | 0.566281000  | 4.812542000  | -0.998519000 |
| H | 0.665916000  | 4.354217000  | -2.004929000 |
| H | 1.388870000  | 5.551511000  | -0.888330000 |
| H | -0.385800000 | 5.376366000  | -0.972300000 |
| C | 0.305446000  | 0.138287000  | 3.206347000  |
| H | -0.672302000 | -0.175960000 | 2.784242000  |
| H | 0.383589000  | 1.240082000  | 3.117136000  |
| H | 0.309904000  | -0.122919000 | 4.283110000  |
| C | 1.300777000  | -2.096018000 | 2.617931000  |
| H | 2.145604000  | -2.643641000 | 2.156691000  |
| H | 0.356820000  | -2.424001000 | 2.135227000  |
| H | 1.259031000  | -2.383289000 | 3.688583000  |
| C | -2.888176000 | 1.846919000  | -1.679646000 |
| H | -2.403593000 | 2.394312000  | -2.515150000 |
| H | -3.982929000 | 2.022017000  | -1.750154000 |
| H | -2.706113000 | 0.761369000  | -1.834537000 |
| C | -3.099107000 | 1.529208000  | 1.410962000  |
| H | -2.727648000 | 1.876742000  | 2.397701000  |
| H | -2.935901000 | 0.431796000  | 1.351409000  |
| H | -4.194420000 | 1.711760000  | 1.375080000  |
| C | -2.701059000 | 4.271816000  | 0.134353000  |
| H | -2.406367000 | 4.862970000  | -0.755183000 |
| H | -2.317972000 | 4.783718000  | 1.038875000  |
| H | -3.810997000 | 4.302741000  | 0.190536000  |
| C | -4.456296000 | -2.565730000 | 2.650075000  |
| H | -4.512351000 | -1.525054000 | 3.034997000  |
| H | -3.841462000 | -3.157988000 | 3.354854000  |

|    |              |              |              |
|----|--------------|--------------|--------------|
| H  | -5.489607000 | -2.970511000 | 2.671165000  |
| N  | 1.380510000  | -0.150627000 | 1.055074000  |
| N  | 1.531450000  | 0.098293000  | -1.097292000 |
| N  | -0.434253000 | 2.137987000  | 0.089532000  |
| Cu | -1.555391000 | -1.171978000 | -0.417539000 |
| Si | -0.009469000 | 0.450748000  | -0.069888000 |
| Si | 0.727205000  | 3.511639000  | 0.368138000  |
| Si | -2.228660000 | 2.445557000  | -0.004019000 |

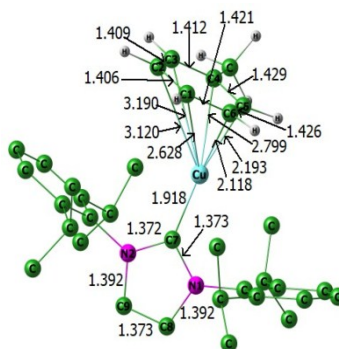

### NHCCu(Tol)<sup>+</sup>

$$E_{M06}^{el} = -3071.379097$$

$$ZPE_{BP86} = 0.678888$$

$$E(E_{M06}^{el} + ZPE_{BP86}) = -3070.700209$$

|    |              |              |              |
|----|--------------|--------------|--------------|
| 29 | -0.141282000 | -0.384437000 | 1.233596000  |
| 7  | -1.342328000 | 0.526170000  | -1.268285000 |
| 7  | 0.819408000  | 0.654353000  | -1.416002000 |
| 6  | 2.944334000  | -0.598525000 | -1.454030000 |
| 6  | -0.189535000 | 0.284966000  | -0.563519000 |
| 6  | -1.060824000 | 1.032520000  | -2.533600000 |
| 1  | -1.849479000 | 1.288284000  | -3.248556000 |
| 6  | 2.856592000  | 1.708378000  | -0.502967000 |
| 6  | -3.273404000 | -0.975950000 | -0.938824000 |
| 6  | 2.103166000  | 3.005807000  | -0.205163000 |
| 1  | 1.017499000  | 2.799693000  | -0.316419000 |
| 6  | 0.306866000  | 1.113494000  | -2.626452000 |
| 1  | 0.955295000  | 1.451387000  | -3.440962000 |
| 6  | 4.321601000  | -0.636074000 | -1.150466000 |
| 1  | 4.905876000  | -1.534512000 | -1.404246000 |
| 6  | 4.236510000  | 1.611245000  | -0.227654000 |
| 1  | 4.755695000  | 2.464493000  | 0.235858000  |
| 6  | 4.961263000  | 0.452830000  | -0.542506000 |
| 1  | 6.038964000  | 0.402792000  | -0.321040000 |
| 6  | -4.557066000 | -1.175029000 | -0.389657000 |
| 1  | -5.054536000 | -2.148844000 | -0.517660000 |
| 6  | -2.674788000 | 0.297167000  | -0.741933000 |
| 6  | 2.072488000  | -0.426104000 | 3.431390000  |
| 1  | 3.019218000  | 0.097641000  | 3.633876000  |
| 6  | -5.216130000 | -0.151122000 | 0.305473000  |

|   |              |              |              |
|---|--------------|--------------|--------------|
| 1 | -6.220155000 | -0.329337000 | 0.721456000  |
| 6 | 2.095373000  | -1.777392000 | 3.031659000  |
| 1 | 3.062146000  | -2.296230000 | 2.934750000  |
| 6 | 2.322551000  | 3.498547000  | 1.239318000  |
| 1 | 2.046743000  | 2.719021000  | 1.978786000  |
| 1 | 1.702567000  | 4.396666000  | 1.439587000  |
| 1 | 3.378481000  | 3.784822000  | 1.426195000  |
| 6 | -0.367922000 | -0.435001000 | 3.339129000  |
| 1 | -1.332943000 | 0.047246000  | 3.564751000  |
| 6 | -2.565607000 | -2.108509000 | -1.684575000 |
| 1 | -1.708387000 | -1.665782000 | -2.235021000 |
| 6 | 2.235456000  | 0.582166000  | -1.107432000 |
| 6 | 0.851388000  | 0.253398000  | 3.582337000  |
| 1 | 0.830700000  | 1.299233000  | 3.924243000  |
| 6 | 0.904363000  | -2.485835000 | 2.759046000  |
| 6 | -3.326182000 | 1.363349000  | -0.065203000 |
| 6 | -2.672429000 | 2.732829000  | 0.128271000  |
| 1 | -1.811471000 | 2.797391000  | -0.570950000 |
| 6 | 2.282994000  | -1.791065000 | -2.146440000 |
| 1 | 1.208248000  | -1.550707000 | -2.287223000 |
| 6 | -4.609083000 | 1.103469000  | 0.460002000  |
| 1 | -5.146877000 | 1.901908000  | 0.994046000  |
| 6 | -0.336195000 | -1.792277000 | 2.903240000  |
| 1 | -1.282209000 | -2.346405000 | 2.787449000  |
| 6 | -3.471185000 | -2.791009000 | -2.729477000 |
| 1 | -4.316342000 | -3.334879000 | -2.258434000 |
| 1 | -2.891130000 | -3.535418000 | -3.312974000 |
| 1 | -3.898333000 | -2.056926000 | -3.442673000 |
| 6 | 2.475554000  | 4.101540000  | -1.230010000 |
| 1 | 1.891016000  | 5.026622000  | -1.044654000 |
| 1 | 2.276587000  | 3.776232000  | -2.271682000 |
| 1 | 3.552281000  | 4.363866000  | -1.163468000 |
| 6 | -3.619330000 | 3.900629000  | -0.212958000 |
| 1 | -4.470702000 | 3.969944000  | 0.495799000  |
| 1 | -4.038294000 | 3.802506000  | -1.235126000 |
| 1 | -3.073515000 | 4.864986000  | -0.158808000 |
| 6 | 0.919454000  | -3.952781000 | 2.409785000  |
| 1 | 1.917651000  | -4.284944000 | 2.065527000  |
| 1 | 0.175308000  | -4.197795000 | 1.625499000  |
| 1 | 0.657351000  | -4.560189000 | 3.303744000  |
| 6 | 2.886123000  | -2.036209000 | -3.546850000 |
| 1 | 3.958107000  | -2.318253000 | -3.486544000 |
| 1 | 2.814059000  | -1.134074000 | -4.188279000 |
| 1 | 2.353552000  | -2.863526000 | -4.060174000 |
| 6 | -1.982469000 | -3.134786000 | -0.687992000 |
| 1 | -1.275052000 | -2.642263000 | 0.014196000  |
| 1 | -1.432438000 | -3.937277000 | -1.222169000 |
| 1 | -2.784896000 | -3.613467000 | -0.087585000 |

|   |              |              |              |
|---|--------------|--------------|--------------|
| 6 | -2.104308000 | 2.864878000  | 1.558559000  |
| 1 | -2.909194000 | 2.792668000  | 2.320431000  |
| 1 | -1.594032000 | 3.841091000  | 1.694426000  |
| 1 | -1.364920000 | 2.060526000  | 1.762688000  |
| 6 | 2.350057000  | -3.061728000 | -1.273882000 |
| 1 | 1.829795000  | -3.905557000 | -1.772848000 |
| 1 | 1.869259000  | -2.894812000 | -0.288068000 |
| 1 | 3.398057000  | -3.379709000 | -1.091762000 |

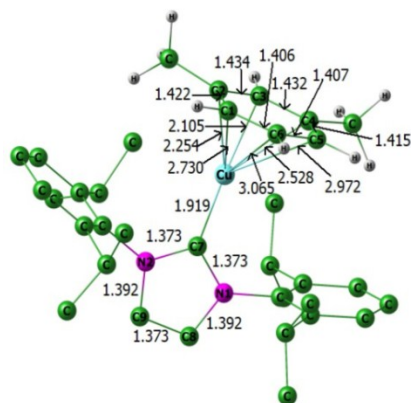

### NHCCu(Xyl)<sup>+</sup>

$$E_{M06}^{el} = -3110.68268$$

$$ZPE_{BP86} = 0.705869$$

$$E(E_{M06}^{el} + ZPE_{BP86}) = -3109.976811$$

|    |              |              |              |
|----|--------------|--------------|--------------|
| 29 | 0.031193000  | -0.259362000 | 1.218286000  |
| 7  | -0.995077000 | 0.055431000  | -1.560790000 |
| 7  | 1.173449000  | 0.024486000  | -1.489214000 |
| 6  | 0.821202000  | 0.143137000  | -2.830568000 |
| 1  | 1.569944000  | 0.197881000  | -3.627096000 |
| 6  | 3.206842000  | 1.218250000  | -0.763927000 |
| 6  | 2.538930000  | -0.013329000 | -1.000702000 |
| 6  | 0.060302000  | -0.033390000 | -0.687237000 |
| 6  | 4.478992000  | -1.280483000 | -0.314137000 |
| 1  | 4.990732000  | -2.240742000 | -0.146070000 |
| 6  | -2.392551000 | 0.043228000  | -1.171959000 |
| 6  | -0.550472000 | 0.162690000  | -2.875863000 |
| 1  | -1.243028000 | 0.236405000  | -3.720194000 |
| 6  | 4.530593000  | 1.150295000  | -0.281104000 |
| 1  | 5.083870000  | 2.083203000  | -0.090601000 |
| 6  | -3.055840000 | -1.208716000 | -1.067046000 |
| 6  | -2.352083000 | -2.538764000 | -1.344462000 |
| 1  | -1.389839000 | -2.311397000 | -1.850577000 |
| 6  | 0.994261000  | -0.102940000 | 3.250531000  |
| 6  | 2.567228000  | 2.576775000  | -1.057147000 |
| 1  | 1.494957000  | 2.403757000  | -1.289024000 |
| 6  | -4.410986000 | -1.189451000 | -0.675869000 |



|   |              |              |              |   |              |              |              |
|---|--------------|--------------|--------------|---|--------------|--------------|--------------|
| 1 | -4.959554000 | -2.139382000 | -0.582666000 | 6 | 1.971767000  | -3.256535000 | 0.230224000  |
| 6 | -1.590661000 | 1.102805000  | 3.303304000  | 1 | 2.834191000  | -3.502189000 | 0.885192000  |
| 1 | -2.583812000 | 1.577346000  | 3.341220000  | 1 | 1.417146000  | -4.196932000 | 0.031622000  |
| 6 | -3.159570000 | -3.447922000 | -2.293247000 | 1 | 1.296525000  | -2.573549000 | 0.791556000  |
| 1 | -4.107883000 | -3.793682000 | -1.831775000 | 6 | -2.742812000 | -1.163199000 | 3.260517000  |
| 1 | -2.572760000 | -4.354310000 | -2.548497000 | 1 | -3.239669000 | -1.077047000 | 4.250528000  |
| 1 | -3.414758000 | -2.929075000 | -3.239638000 | 1 | -2.513891000 | -2.232513000 | 3.090904000  |
| 6 | 3.156761000  | -1.277795000 | -0.805274000 | 1 | -3.478069000 | -0.837882000 | 2.496399000  |
| 6 | -3.043156000 | 1.285085000  | -0.941863000 | 6 | -2.347846000 | 2.631836000  | -1.147896000 |
| 6 | 5.158359000  | -0.082240000 | -0.050937000 | 1 | -1.262463000 | 2.435723000  | -1.279004000 |
| 1 | 6.193593000  | -0.109319000 | 0.323933000  | 6 | -0.197007000 | -0.900398000 | 3.209842000  |
| 6 | 2.436710000  | -2.598110000 | -1.086502000 | 1 | -0.109180000 | -1.998677000 | 3.268277000  |
| 1 | 1.524029000  | -2.365871000 | -1.675497000 | 6 | -2.492294000 | 3.564770000  | 0.071218000  |
| 6 | -1.499893000 | -0.307438000 | 3.229067000  | 1 | -1.917166000 | 4.499972000  | -0.089200000 |
| 6 | 3.287592000  | -3.568770000 | -1.930510000 | 1 | -2.112166000 | 3.082353000  | 0.994685000  |
| 1 | 4.184914000  | -3.921442000 | -1.380857000 | 1 | -3.547925000 | 3.858418000  | 0.248819000  |
| 1 | 3.632480000  | -3.097512000 | -2.873275000 | 6 | -0.430969000 | 1.898566000  | 3.344580000  |
| 1 | 2.694615000  | -4.468291000 | -2.195559000 | 1 | -0.522105000 | 2.993903000  | 3.411200000  |
| 6 | -4.400137000 | 1.239565000  | -0.559287000 | 6 | 2.617428000  | 3.525465000  | 0.157507000  |
| 1 | -4.940684000 | 2.181310000  | -0.376704000 | 1 | 3.658736000  | 3.783540000  | 0.442217000  |
| 6 | -2.012499000 | -3.263558000 | -0.024153000 | 1 | 2.123727000  | 3.073871000  | 1.042175000  |
| 1 | -1.368245000 | -2.627120000 | 0.620076000  | 1 | 2.097218000  | 4.477633000  | -0.074669000 |
| 1 | -1.470824000 | -4.212113000 | -0.220291000 | 6 | 2.358795000  | -0.740000000 | 3.381734000  |
| 1 | -2.932156000 | -3.510326000 | 0.546985000  | 1 | 3.117759000  | -0.211398000 | 2.771027000  |
| 6 | -5.075709000 | 0.018709000  | -0.419840000 | 1 | 2.349938000  | -1.805485000 | 3.082496000  |
| 1 | -6.136484000 | 0.009242000  | -0.123621000 | 1 | 2.693113000  | -0.692269000 | 4.440699000  |
| 6 | 3.211797000  | 3.226632000  | -2.302521000 | 6 | -2.855961000 | 3.315545000  | -2.437711000 |
| 1 | 4.286433000  | 3.446566000  | -2.131581000 | 1 | -3.938595000 | 3.551256000  | -2.367344000 |
| 1 | 2.707785000  | 4.184014000  | -2.549487000 | 1 | -2.713957000 | 2.670959000  | -3.329340000 |
| 1 | 3.145590000  | 2.566748000  | -3.191848000 | 1 | -2.314888000 | 4.268047000  | -2.615940000 |
| 6 | 0.845170000  | 1.310612000  | 3.297690000  |   |              |              |              |
| 1 | 1.745881000  | 1.942879000  | 3.341360000  |   |              |              |              |

## References:

1. Frisch, M. J.; Trucks, G. W.; Schlegel, H. B.; Scuseria, G. E.; Robb, M. A.; Cheeseman, J. R.; Scalmani, G.; Barone, V.; Mennucci, B.; Petersson, G. A.; Nakatsuji, H.; Caricato, M.; Li, X.; Hratchian, H. P.; Izmaylov, A. F.; Bloino, J.; Zheng, G.; Sonnenberg, J. L.; Hada, M.; Ehara, M.; Toyota, K.; Fukuda, R.; Hasegawa, J.; Ishida, M.; Nakajima, T.; Honda, Y.; Kitao, O.; Nakai, H.; Vreven, T.; Montgomery, J. A.; Peralta, Jr., J. E.; Ogliaro, F.; Bearpark, M.; Heyd, J. J.; Brothers, E.; Kudin, K. N.; Staroverov, V. N.; Keith, T.; Kobayashi, R.; Normand, J.; Raghavachari, K.; Rendell, A.; Burant, J. C.; Iyengar, S. S.; Tomasi, J.; Cossi, M.; Rega, N.; Millam, J. M.; Klene, M.; Knox, J. E.; Cross, J. B.; Bakken,

- V.; Adamo, C.; Jaramillo, J.; Gomperts, R.; Stratmann, R. E.; Yazyev, O.; Austin, A. J.; Cammi, R.; Pomelli, C.; Ochterski, J. W.; Martin, R. L.; Morokuma, K.; Zakrzewski, V. G.; Voth, G. A.; Salvador, P.; Dannenberg, J.; Dapprich, S.; Daniels, A. D.; Farkas, O.; Foresman, J. B.; Ortiz, J. V.; Cioslowski, J.; Fox, D. J. Gaussian 09 (Revision B.01), Gaussian, Inc., Wallingford CT, **2010**.
- (a) A. D. Becke, *Phys. Rev. A* 1988, **38**, 3098–3100. (b) J. P. Perdew, *Phys. Rev. B* 1986, **33**, 8822–8824; (c) J. P. Perdew, *Phys. Rev. B* 1986, **34**, 7406–7406.
  - F. Weigend, R. Ahlrichs, *Phys. Chem. Chem. Phys.* 2005, **7**, 3297–3303.
  - Y. Zhao, D. G. Truhlar, *Theor. Chem. Acc.* 2008, **120**, 215–241.
  - (a) S. Grimme, J. Antony, S. Ehrlich, H. Krieg, *J. Chem. Phys.*, 2010, **132**, 154104-154119. (b) S. Grimme, S. Ehrlich, L. Goerigk, *J. Comp. Chem.* 2011, **32**, 1456–1465.
  - (a) A. E. Reed, L. A. Curtiss, F. Weinhold, *Chem. Rev.* 1988, **88**, 899–926. (b) E. D. Glendening, A. E. Reed, J. E. Carpenter, F. Weinhold, NBO Version 5.9.
  - ADF 2013.01, SCM, Theoretical Chemistry, Vrije Universiteit, Amsterdam, <http://www.scm.com>; G. te Velde, F. M. Bickelhaupt, E. J. Baerends, C. F. Guerra, S. J. A. van Gisbergen, J. G. Snijders, T. Ziegler *J. Comput. Chem.* 2001, **22**, 931–967.
  - (a) C. Chang, M. Pelissier, P. Durand, *Phys. Scr.* 1986, **34**, 394–404. (b) J. -L. Heully, I. Lindgren, E. Lindroth, S. Lundquist, A.-M. Martensson-Pendrill, *J. Phys. B* 1986, **19**, 2799–2815. (c) E. van Lenthe, E. J. Baerends, J. G. Snijders, *J. Chem. Phys.* 1993, **99**, 4597–4610. (d) E. van Lenthe, J. G. Snijders, E. J. Baerends, *J. Chem. Phys.* 1996, **105**, 6505–6516. (e) E. van Lenthe, R. van Leeuwen, E. J. Baerends, J. G. Snijders, *Int. J. Quantum Chem.* 1996, **57**, 281–293.
  - (a) K. Morokuma, *J. Chem. Phys.* 1971, **55**, 1236–1244. (b) T. Ziegler, A. Rauk, *Inorg. Chem.* 1979, **18**, 1755–1759. (c) T. Ziegler, A. Rauk, *Inorg. Chem.* 1979, **18**, 1558–1565. (d) M. V. Hopffgarten, G. Frenking, *WIREs Comput. Mol. Sci.* 2012, **2**, 43–62.
  - (a) M. Mitoraj, A. Michalak, *Organometallics* 2007, **26**, 6576–6580. (b) M. Mitoraj, A. Michalak, *J. Mol. Model.* 2007, **13**, 347–355. (c) M. Mitoraj, A. Michalak, T. Ziegler, *J. Phys. Chem. A* 2008, **112**, 1933–1939. (d) M. Mitoraj, A. Michalak, *J. Mol. Model.* 2008, **14**, 681–687. (e) M. Mitoraj, A. Michalak, T. Ziegler, *J. Chem. Theory Comput.* 2009, **5**, 962–975. (f) T. A. N. Nguyen, G. Frenking, *Chem. Eur. J.* 2012, **18**, 12733–12748. (g) M. Mousavi, G. Frenking, *Organometallics* 2013, **32**, 1743–1751.

**S5.  $^1\text{H}$  NMR spectrum of the catalysis products:**

**$^1\text{H}$  NMR (400.31 MHz,  $\text{CDCl}_3$ ) of compound I<sup>2</sup>.**

\* = Toluene peak, \*\* =  $\text{H}_2\text{O}$  peak, # = Grease peak.

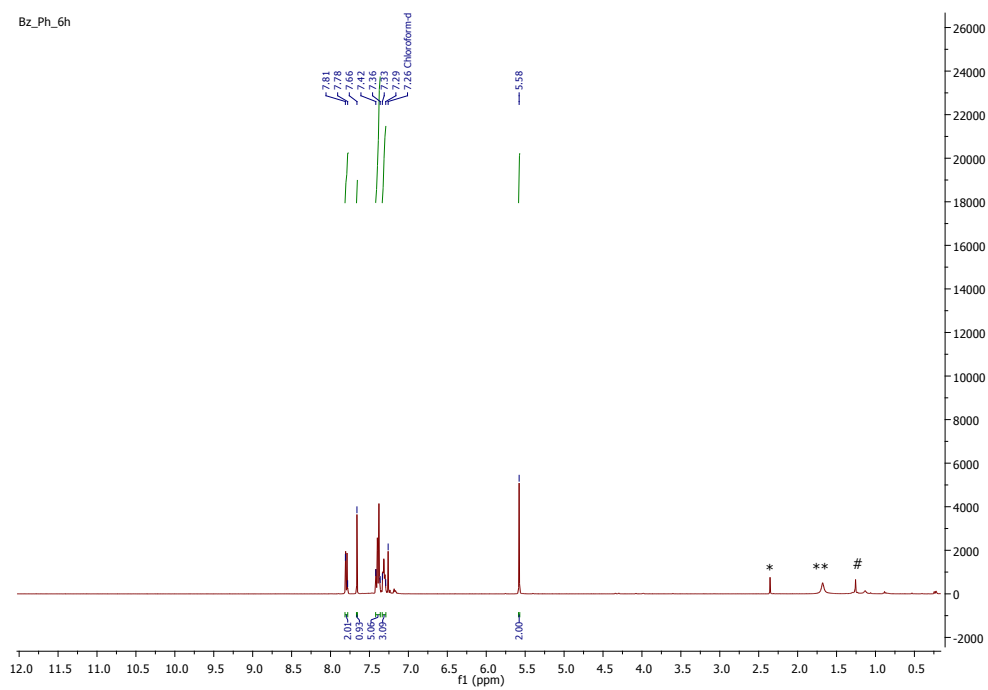

### $^1\text{H}$ NMR (400.31 MHz, $\text{CDCl}_3$ ) of compound I<sup>5</sup>.

\* = Toluene peak, \*\* =  $\text{H}_2\text{O}$  peak, # = Grease peak, s = Starting material peak.

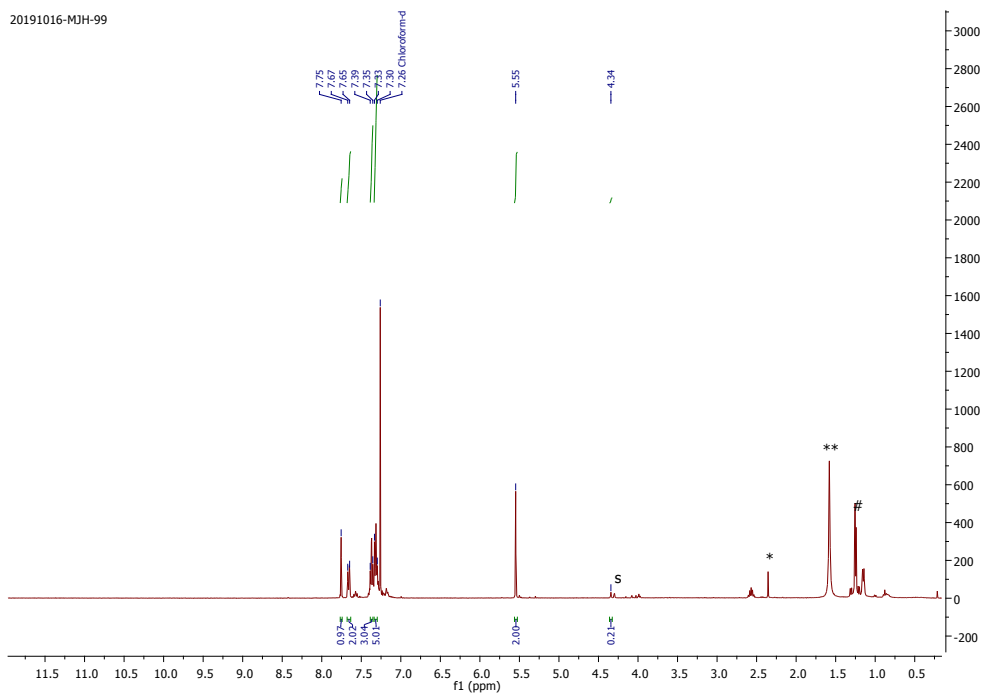

### $^1\text{H}$ NMR (400.31 MHz, $\text{CDCl}_3$ ) of compound II<sup>2</sup>.

\* = Toluene peak, \*\* =  $\text{H}_2\text{O}$  peak, # = Grease peak.

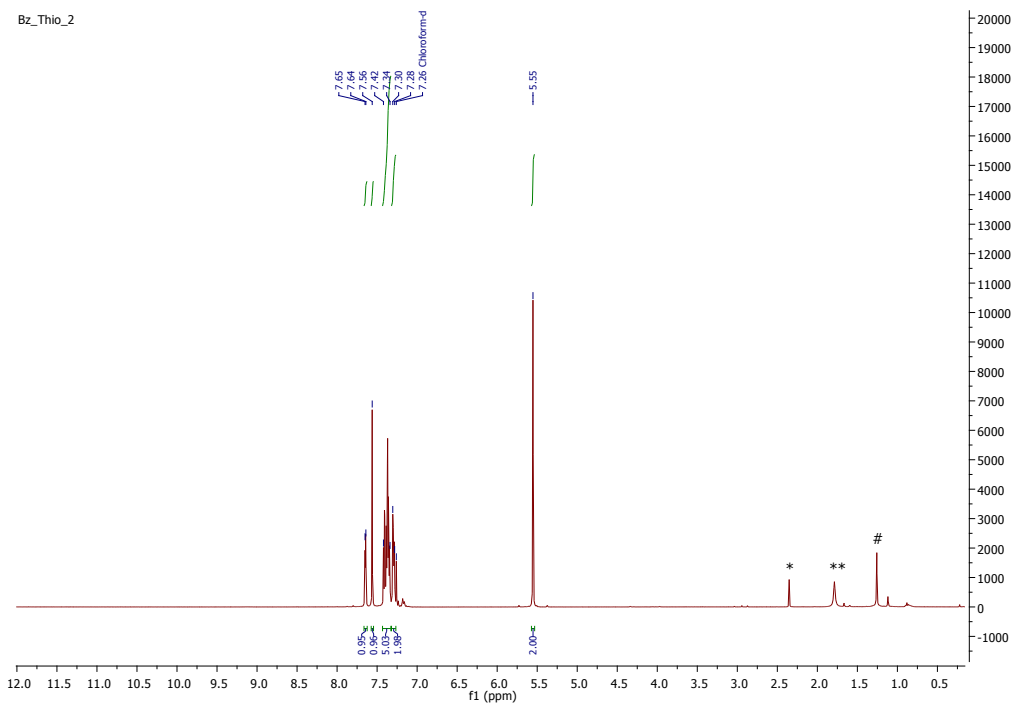

### <sup>1</sup>H NMR of(400.31 MHz, CDCl<sub>3</sub>) compound II<sup>5</sup>.

\* = Toluene peak, \*\* = H<sub>2</sub>O peak, # = Grease peak, s = Starting material peak.

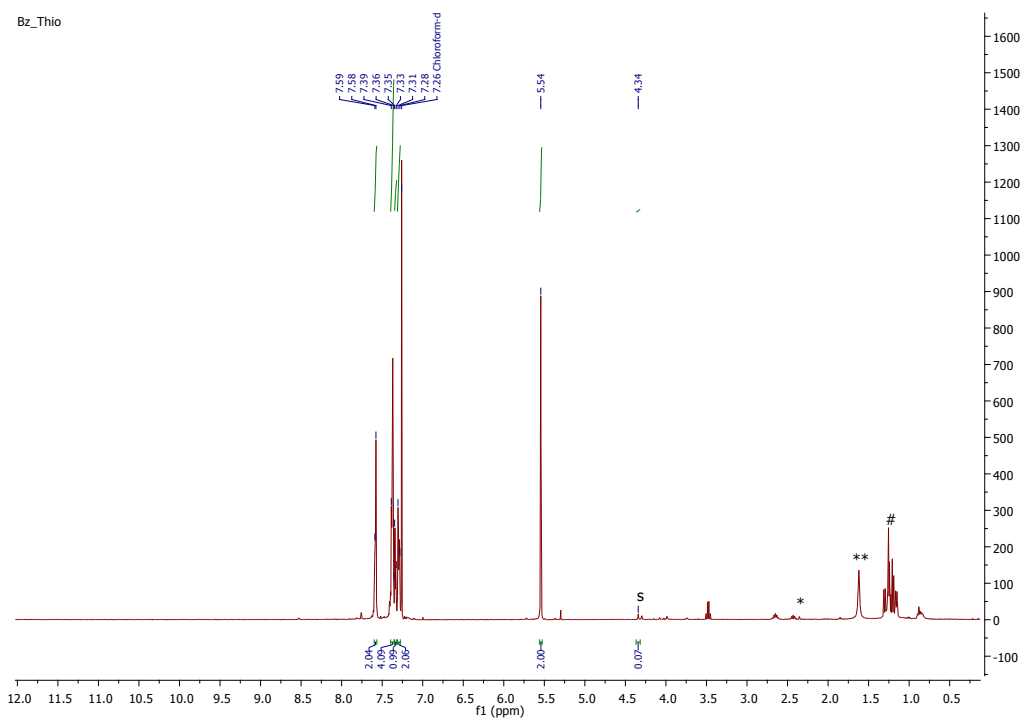

### <sup>1</sup>H NMR (400.31 MHz, CDCl<sub>3</sub>)of compound III<sup>2</sup>.

\* = Toluene peak, \*\* = H<sub>2</sub>O peak, # = Grease peak, s = Starting material peak.

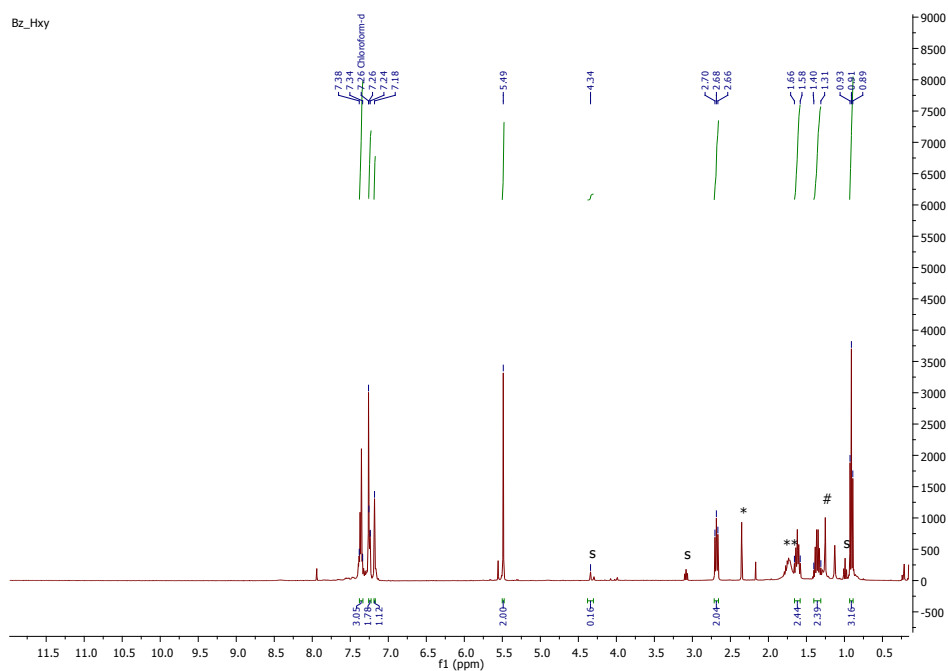

**<sup>1</sup>H NMR (400.31 MHz, CDCl<sub>3</sub>) of compound III<sup>5</sup>.**

# = Grease peak.

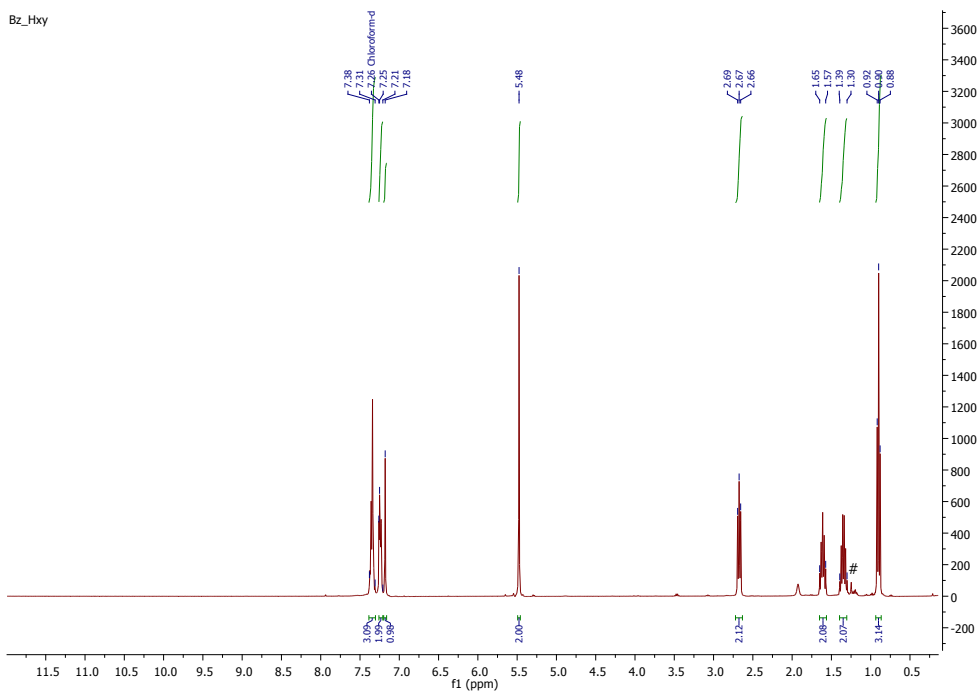

**<sup>1</sup>H NMR(400.31 MHz, CDCl<sub>3</sub>) of compound IV<sup>2</sup>.**

\* = Toluene peak, \*\* = H<sub>2</sub>O peak, # = Grease peak, s = Starting material peak.

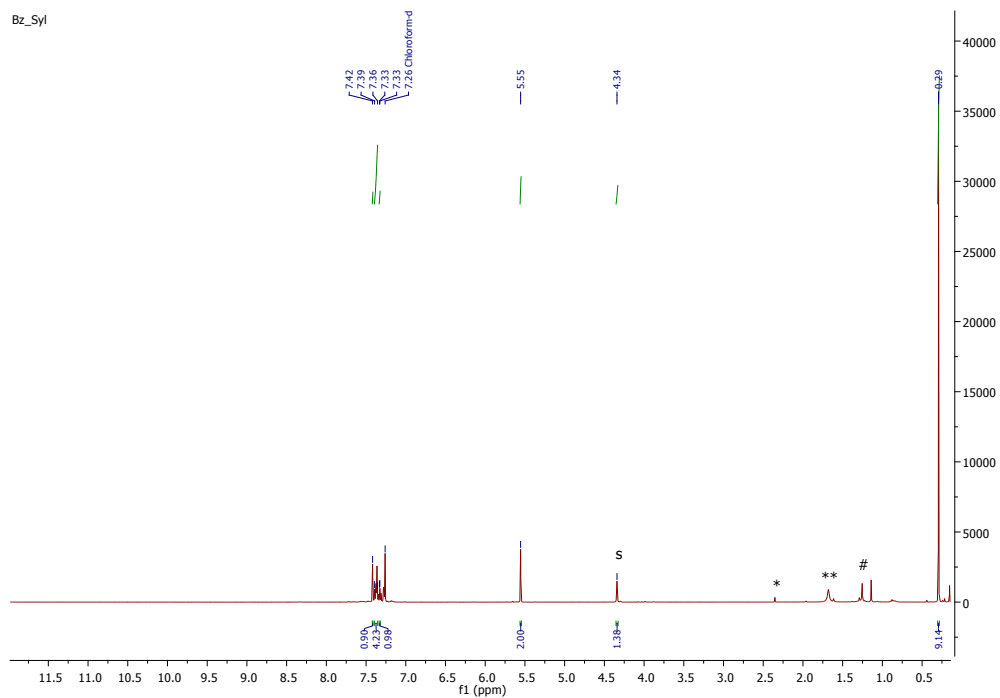

### <sup>1</sup>H NMR (400.31 MHz, CDCl<sub>3</sub>) of compound IV<sup>5</sup>.

\* = Toluene peak, \*\* = H<sub>2</sub>O peak, # = Grease peak, s = Starting material peak.

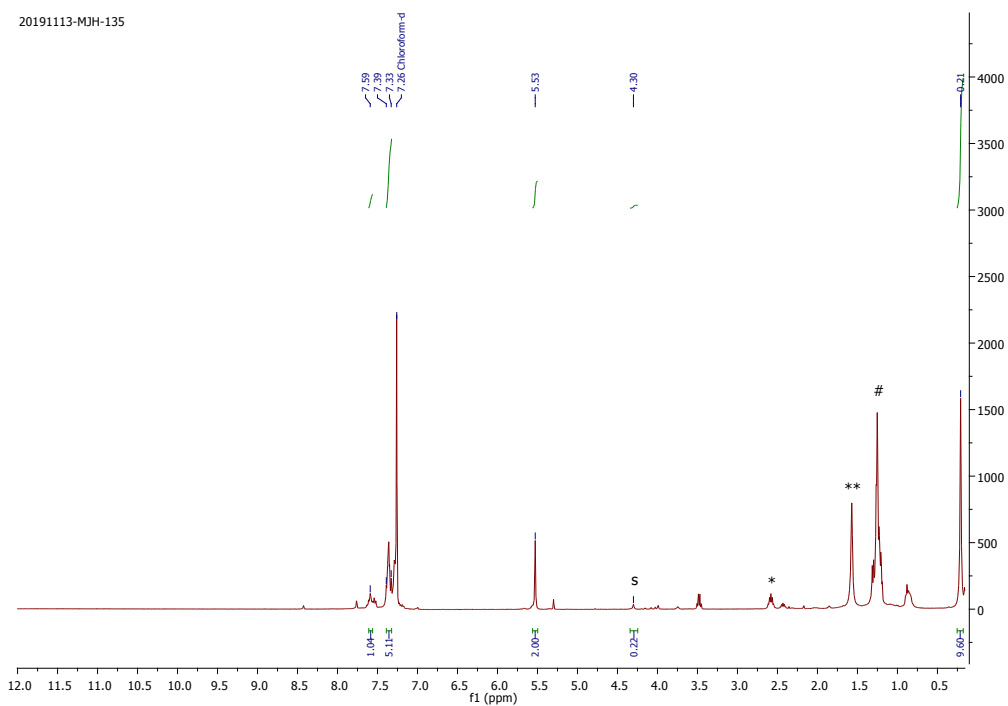

### <sup>1</sup>H NMR (400.31 MHz, CDCl<sub>3</sub>) of compound V<sup>2</sup>.

\* = Toluene peak, # = Grease peak, s = Starting material peak.

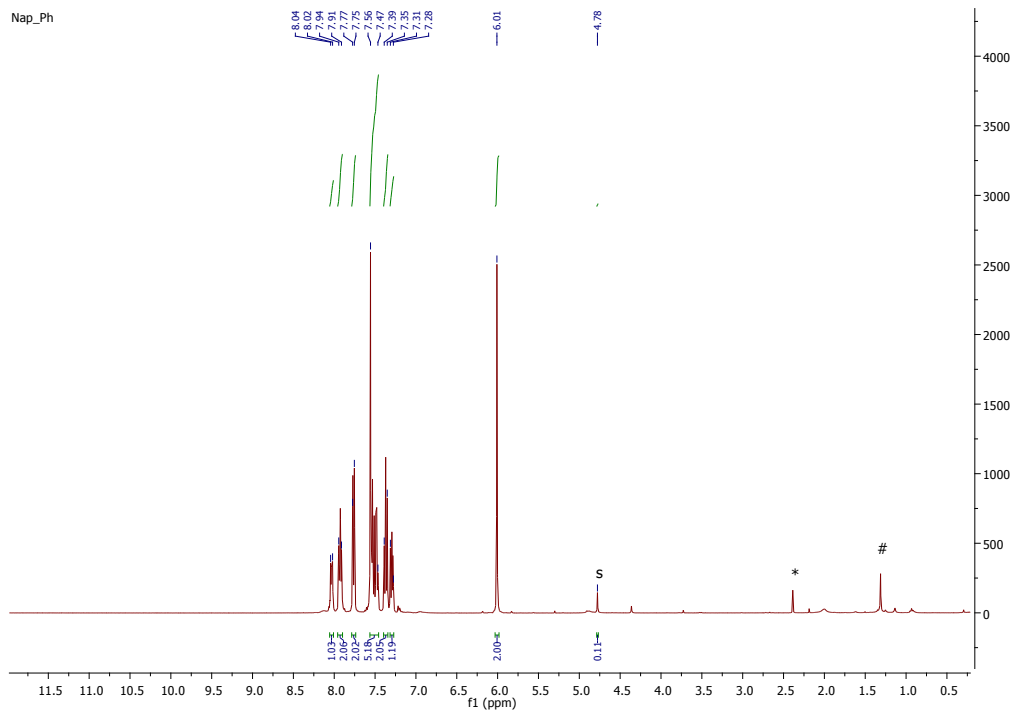





**$^1\text{H}$  NMR (400.31 MHz,  $\text{CDCl}_3$ ) of compound VIII<sup>2</sup>.**

\*\* =  $\text{H}_2\text{O}$ , # = Grease peak

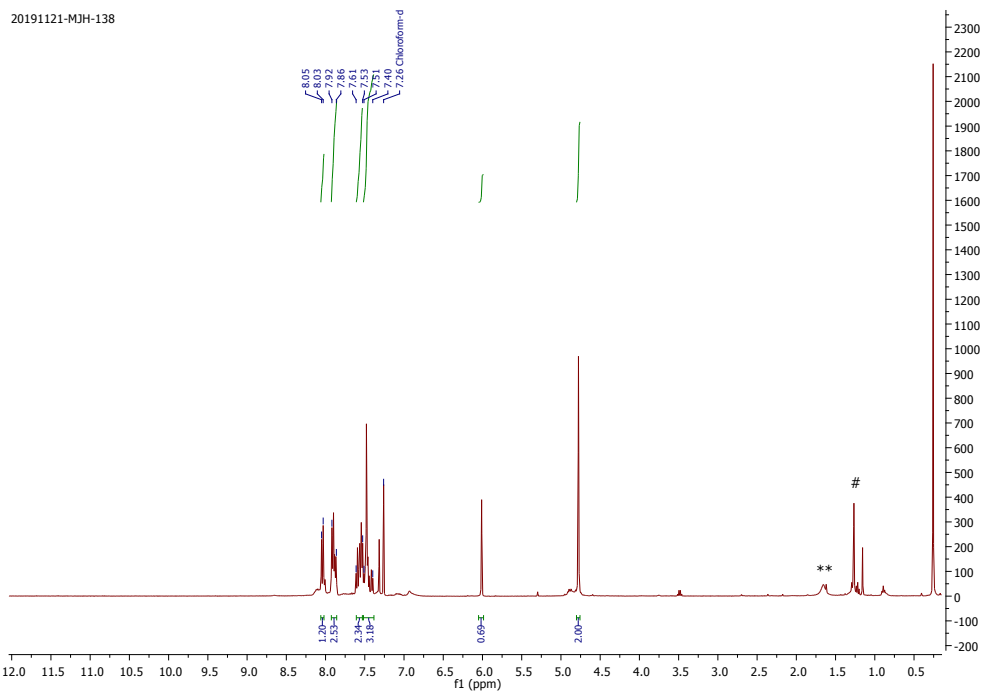

**$^1\text{H}$  NMR (400.31 MHz,  $\text{CDCl}_3$ ) of compound IX<sup>2</sup>.**

# = Grease peak

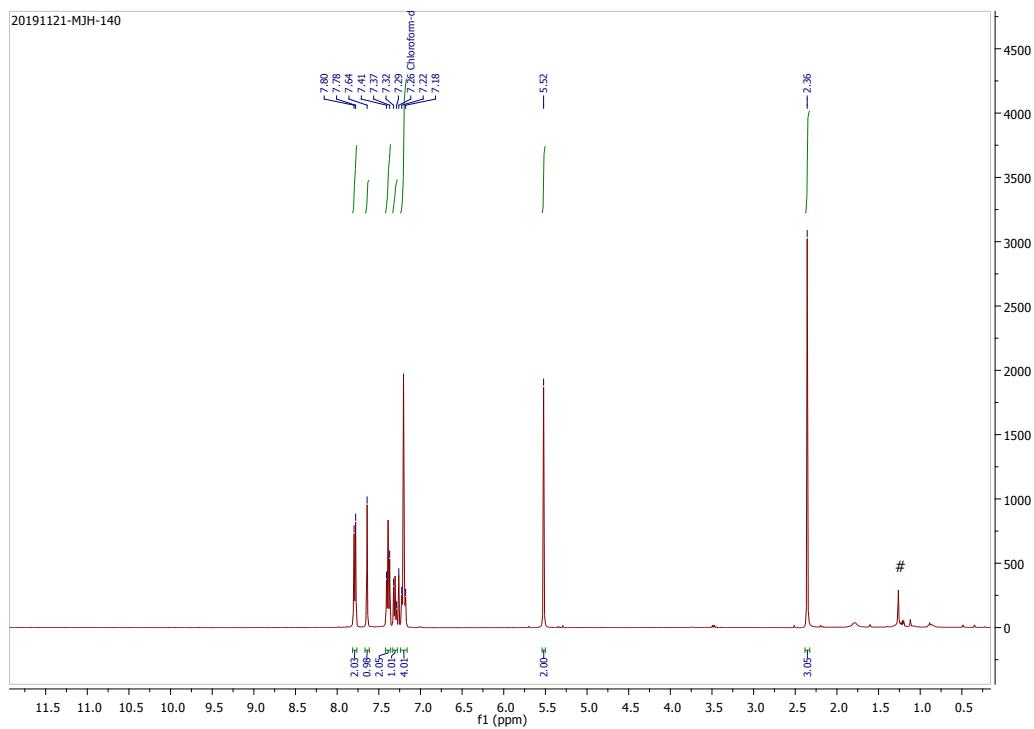

### $^1\text{H}$ NMR (400.31 MHz, $\text{CDCl}_3$ ) of compound $\text{X}^2$ .

# = Grease peak

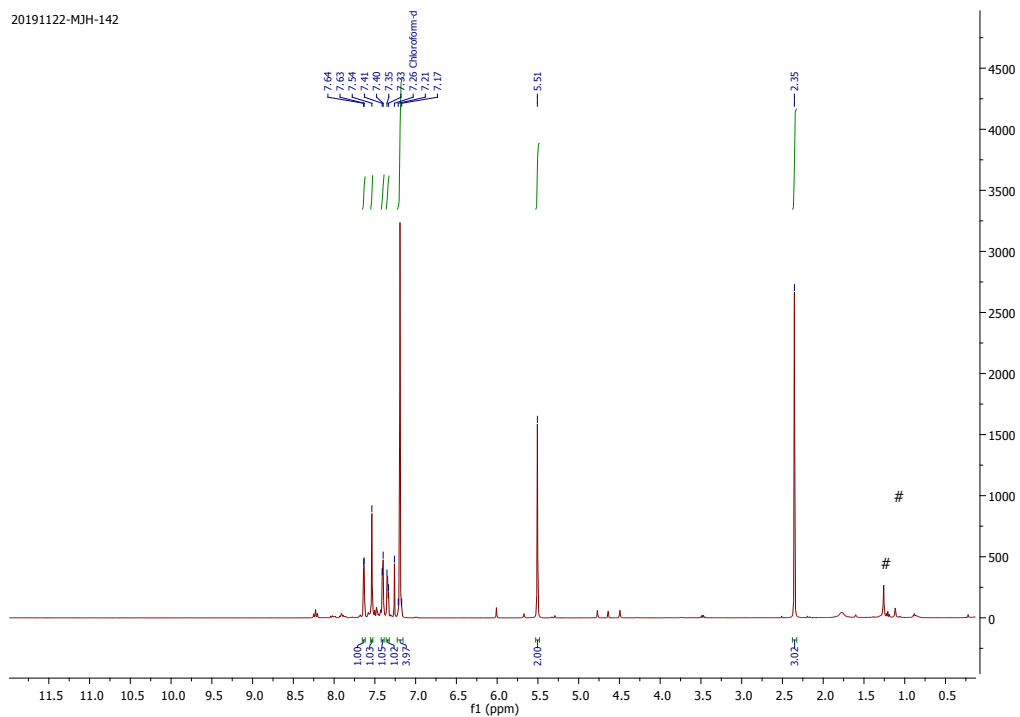

### $^1\text{H}$ NMR (400.31 MHz, $\text{CDCl}_3$ ) of compound $\text{XI}^2$ .

# = Grease peak, s = Starting material peak

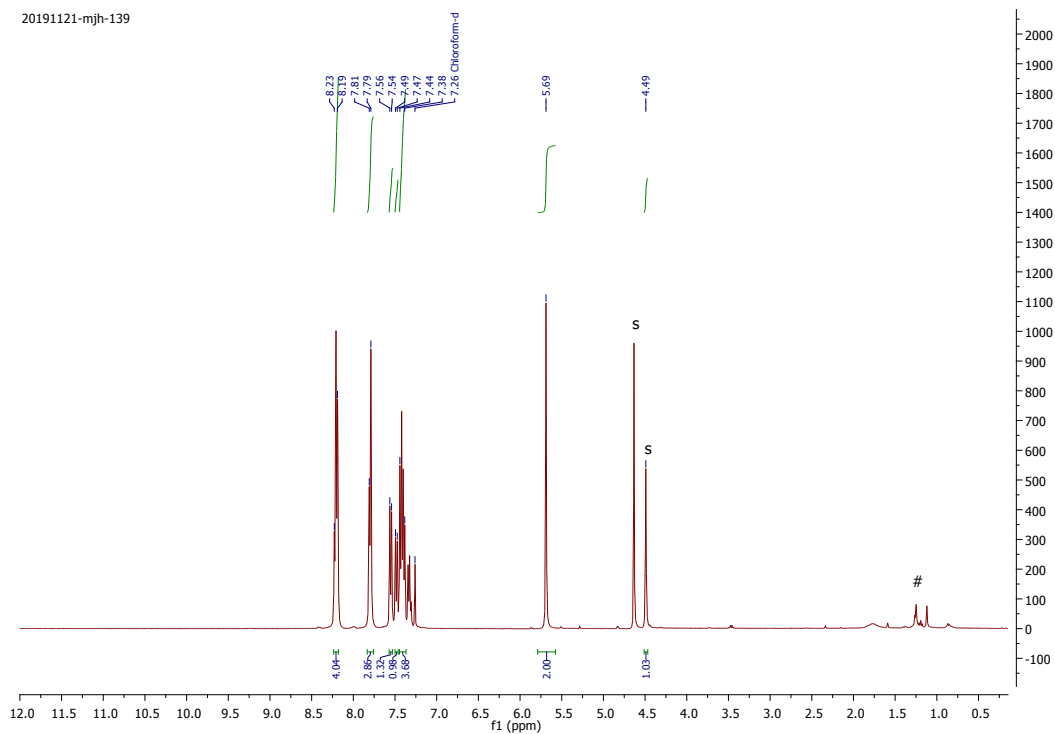

# $^1\text{H}$ NMR (400.31 MHz, $\text{CDCl}_3$ ) of compound XII<sup>2</sup>.

\*\* =  $\text{H}_2\text{O}$  peak, # = Grease peak

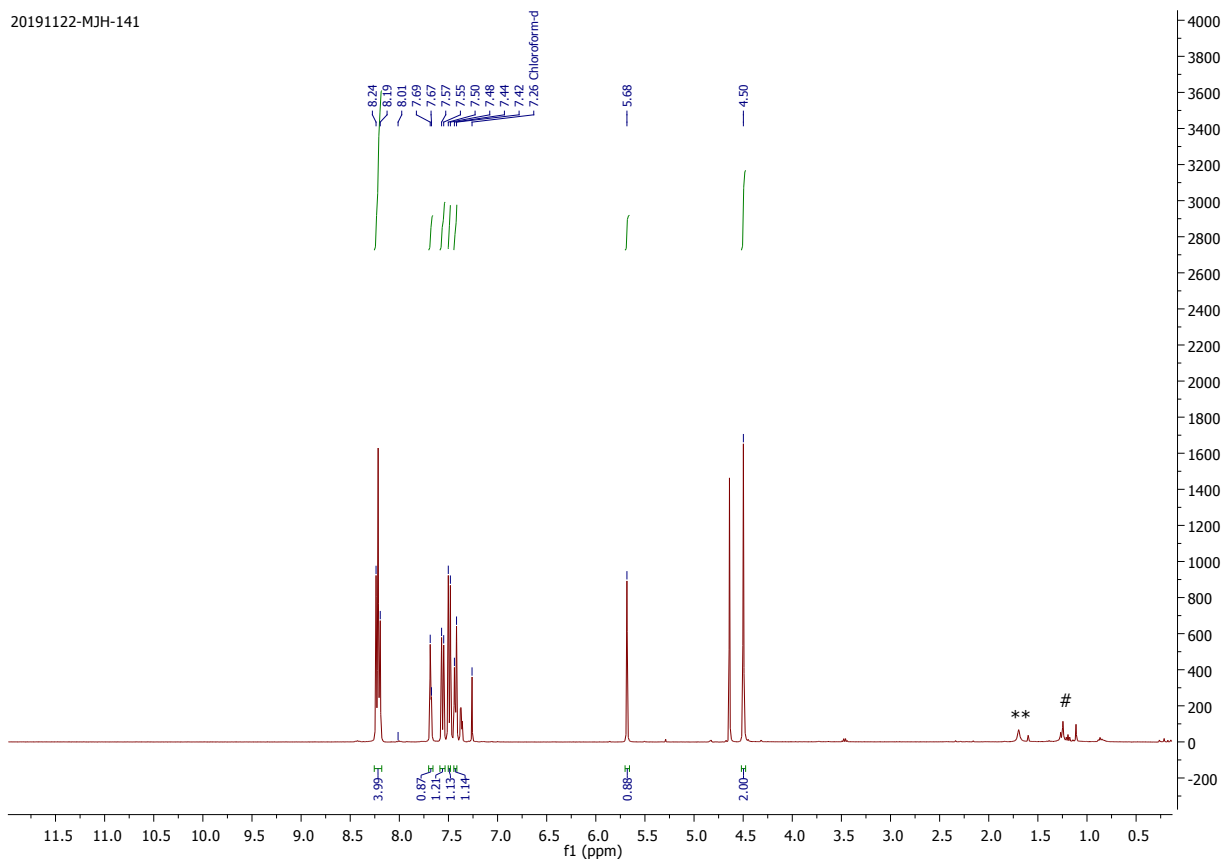

Supplement: c9cc09115g1.pdf [file c9cc09115g1.pdf]
